# Supplementary material for: Carboxylation of alkynylsilanes with carbon dioxide mediated by cesium fluoride in DMSO
Source: Royal Society of Chemistry journal article supplement (doi:10.1039/c3ob40760h), 2013-01-01

## Electronic Supplementary Information

### Carboxylation of alkynylsilanes with carbon dioxide

#### mediated by cesium fluoride in DMSO

Misato Yonemoto-Kobayashi, Kiyofumi Inamoto, Yoshiyuki Tanaka and Yoshinori Kondo\*

*Graduate School of Pharmaceutical Sciences, Tohoku University*

*6-3, Aoba, Aramaki, Aoba-ku, Sendai 980-8578, Japan*

*e-mail: ykondo@m.tohoku.ac.jp*

#### Table of Contents

|                                                                                            |     |
|--------------------------------------------------------------------------------------------|-----|
| 1. General comments .....                                                                  | S2  |
| 2. Representative procedure for carboxylation of alkynylsilanes with CO <sub>2</sub> ..... | S2  |
| 3. Representative procedure for syntheses of alkynoates .....                              | S2  |
| 4. Characterization data .....                                                             | S3  |
| 5. Copies of <sup>1</sup> H NMR and <sup>13</sup> C NMR spectra of products .....          | S10 |

## 1. General comments

All reactions were carried out under a CO<sub>2</sub> atmosphere unless otherwise noted. Anhydrous solvents were obtained from commercial suppliers and used without further purification. Commercially available materials were purchased from Tokyo Kasei Co., Aldrich Inc. and other suppliers and were used after appropriate purification (distillation or recrystallization). CsF was purchased from Aldrich and stored in a argon-filled glovebox after dried by a heat gun under vacuum. Flash column chromatography was performed with Kanto silica gel 60 N (spherical, neutral, 70–230 mesh). A CO<sub>2</sub> gas cylinder was purchased from Taiyo Nissan Co. (G1 grade).

Melting points were measured with a Yazawa micro melting point apparatus and uncorrected. IR spectra were recorded on a SHIMADZU IRAffinity. <sup>1</sup>H-NMR spectra were recorded on JEOL AL400 (400 MHz) or JEOL ECA600 (600MHz) spectrometer. <sup>1</sup>H NMR spectra were referenced to tetramethylsilane as an internal standard or to a solvent signal (CDCl<sub>3</sub>: 7.26 ppm) or (acetone-d<sub>6</sub>: 2.09 ppm) or (CD<sub>3</sub>OD: 3.34 ppm). <sup>13</sup>C NMR spectra were referenced to a solvent signal (CDCl<sub>3</sub>: 77.0 ppm) or (acetone-d<sub>6</sub>: 30.6 ppm) or (CD<sub>3</sub>OD: 50.0 ppm). The following abbreviations are used: s = singlet, d = doublet, t = triplet, q = quartet, quint = quintet, sext = sextet, m = multiplet, dd = double doublet, dt = double triplet. Mass spectra and high resolution mass spectra were measured on JEOL JMS-DX303 and JMS-700/JMS-T 100 GC spectrometer respectively. Elemental analyses were performed by Yanaco CHN CORDER MT-6.

## 2. Representative procedure for carboxylation of alkynylsilanes with CO<sub>2</sub>

### Reaction of 1-phenyl-2-trimethylsilylacetylene (**1a**) with CO<sub>2</sub> (Table 1, entry 6)

A dried and CO<sub>2</sub> (balloon) infused Schlenk-flask, equipped with a magnetic stirrer and a septum, was charged with CsF (54.7 mg, 0.36 mmol) in DMSO (0.75 mL). 1-Phenyl-2-trimethylsilylacetylene (**1a**) (52.3 mg, 0.3 mmol) was added to a reaction mixture and the reaction was stirred at room temperature for 3 h. The reaction mixture was diluted with water (30 mL) and extracted with CH<sub>2</sub>Cl<sub>2</sub> (2 × 10 mL). The aqueous layer was acidified (> pH 1) with aqueous HCl (6 M) at 0 °C and then extracted with diethyl ether (4 × 20 mL). The combined organic layers were dried over Na<sub>2</sub>SO<sub>4</sub>. The solvent was removed under vacuum to afford **2a** (42 mg, 96%).

## 3. Representative procedure for syntheses of alkynoates

### Reaction of 1-phenyl-2-trimethylsilylacetylene (**1a**) with CO<sub>2</sub> followed by addition of methyl iodide (Table 2, entry 1)

A dried and CO<sub>2</sub> (balloon) infused Schlenk-flask, equipped with a magnetic stirrer and a septum, was charged with CsF (54.7 mg, 0.36 mmol) in DMSO (0.75 mL). 1-Phenyl-2-trimethylsilylacetylene (**1a**) (52.3 mg, 0.3

mmol) was added to a reaction mixture and the reaction was stirred at room temperature for 3 h. Methyl iodide (0.36 mmol) was added to the reaction mixture and the reaction was stirred at room temperature for 1 h. Saturated aqueous NH<sub>4</sub>Cl (5 mL) was added and the whole mixture was extracted with AcOEt (10 mL x 3). The combined organic layers were washed with brine (10 mL) and dried over MgSO<sub>4</sub>. The organic phase was concentrated under reduced pressure and the crude material was purified by silica gel column chromatography to give **3aa** (39 mg, 81%).

#### 4. Characterization data

##### 3-Phenyl-2-propynoic acid (2a)

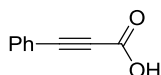

Yellow needles (recrystallized from AcOEt/hexane), mp 138–139 °C.

IR (neat): 2958, 2925, 2854, 2228, 2198, 1669, 1488, 1417, 1302, 1287, 1207, 1171, 918, 752, 738, 682 cm<sup>-1</sup>.

<sup>1</sup>H NMR (400 MHz, CDCl<sub>3</sub>/TMS) δ (ppm): 7.37–7.42 (m, 2H), 7.46–7.50 (m, 1H), 7.60–7.62 (m, 2H).

<sup>13</sup>C{<sup>1</sup>H} NMR (150 MHz, CDCl<sub>3</sub>) δ (ppm): 80.1, 89.1, 119.0, 128.6, 131.1, 133.2, 158.8.

LRMS (EI) *m/z*: 146 (M<sup>+</sup>). HRMS: Calcd. For C<sub>9</sub>H<sub>6</sub>O<sub>2</sub>: 146.03678, found: 146.0391.

##### 3-(4-Methylphenyl)-2-propynoic acid (2b)

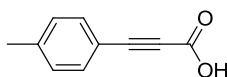

Yellow needle (recrystallized from CH<sub>3</sub>CN), mp 153–155 °C.

IR (neat): 2195, 1669, 1507, 1142, 1295, 1179, 819 cm<sup>-1</sup>.

<sup>1</sup>H NMR (400 MHz, CDCl<sub>3</sub>/TMS) δ (ppm): 2.39 (s, 3H), 7.20 (d, *J* = 8.0 Hz, 2H), 7.51 (d, *J* = 8.0 Hz, 2H).

<sup>13</sup>C{<sup>1</sup>H} NMR (100 MHz, CDCl<sub>3</sub>) δ (ppm): 21.7, 79.8, 89.8, 115.9, 129.4, 133.3, 142.0, 158.9

LRMS (EI) *m/z*: 160 (M<sup>+</sup>). HRMS: Calcd. For C<sub>10</sub>H<sub>8</sub>O<sub>2</sub>: 160.0524, found: 160.0511.

*Anal.* Calcd. for C<sub>10</sub>H<sub>8</sub>O<sub>2</sub>: C, 74.99; H, 5.03; O, 19.98. Found: C, 75.01; H, 5.12.

##### 3-(4-Methoxyphenyl)-2-propynoic acid (2c)

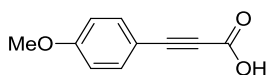

Colorless prism (recrystallized from CH<sub>3</sub>CN), mp 146–147 °C.

IR (neat): 2198, 1666, 1599, 1509, 1316, 1295, 1252, 1214, 1167, 832 cm<sup>-1</sup>.

<sup>1</sup>H NMR (400 MHz, CDCl<sub>3</sub>/TMS) δ (ppm): 3.85 (s, 3H), 6.88–6.92 (m, 2H), 7.55–7.59 (d, 2H).

<sup>13</sup>C{<sup>1</sup>H} NMR (100 MHz, acetone-d<sub>6</sub>) δ (ppm): 56.7, 81.8, 87.6, 112.8, 116.2, 136.4, 155.5, 163.5.

LRMS (EI)  $m/z$ : 176 ( $M^+$ ). HRMS: Calcd. For  $C_{10}H_8O_3$ : 176.0473, found: 176.0460.

*Anal.* Calcd. for  $C_{10}H_8O_3$ : C, 68.18; H, 4.58; O, 27.25, found: C, 68.31; H, 4.58.

### 3-(2-Methoxyphenyl)-2-propynoic acid (2d)

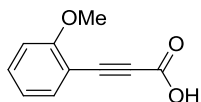

Colorless prism (recrystallized from AcOEt/petroleum ether), mp 132–133 °C.

IR (neat): 2201, 1740, 1669, 1491, 1419, 1252, 1229, 1200  $cm^{-1}$ .

$^1H$  NMR (600 MHz,  $CDCl_3/TMS$ )  $\delta$  (ppm): 3.91 (s, 3H), 6.91–6.97 (m, 2H), 7.42–7.45 (m, 1H), 7.54–7.55 (m, 1H).

$^{13}C\{^1H\}$  NMR (150 MHz,  $CDCl_3$ )  $\delta$  (ppm): 55.8, 84.0, 86.3, 108.3, 110.9, 120.6, 132.9, 135.2, 158.8, 161.9.

LRMS (EI)  $m/z$ : 176 ( $M^+$ ). HRMS: Calcd. For  $C_{10}H_8O_3$ : 176.0473, found: 176.0462.

### 3-(3-Hydroxyphenyl)-2-propynoic acid (2e)

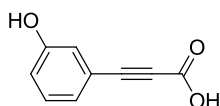

Colorless prism (recrystallized from acetone/hexane), mp 192–195 °C.

IR (neat): 3174, 2216, 1690, 1580, 1235, 980  $cm^{-1}$ .

$^1H$  NMR (400 MHz, acetone- $d_6$ )  $\delta$  (ppm): 7.04–7.16 (m, 3H), 7.32–7.36 (m, 1H).

$^{13}C\{^1H\}$  NMR (1500 MHz, acetone- $d_6$ )  $\delta$  (ppm): 82.0, 86.8, 120.0, 120.6, 122.1, 125.7, 131.8, 155.3, 159.1.

LRMS (EI)  $m/z$ : 162 ( $M^+$ ). HRMS: Calcd. For  $C_9H_6O_3$ : 162.0317, found: 162.0301.

### 3-(4-Fluorophenyl)-2-propynoic acid (2f)

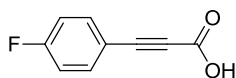

Colorless needle (recrystallized from  $CH_3CN$ ), mp 155–157 °C.

IR (neat): 2206, 1589, 1506, 1220, 1157, 834  $cm^{-1}$ .

$^1H$  NMR (400 MHz, acetone- $d_6$ )  $\delta$  (ppm): 7.29–7.33 (m, 2H), 7.74–7.79 (m, 2H).

$^{13}C\{^1H\}$  NMR (150 MHz, acetone- $d_6$ )  $\delta$  (ppm): 82.3, 85.6, 117.9 (d,  $J = 22.5$  Hz), 137.0 (d,  $J = 10.5$  Hz), 155.2 (d,  $J = 2.9$  Hz), 164.7, 166.4.

LRMS (EI)  $m/z$ : 164 ( $M^+$ ). HRMS: Calcd. For  $C_9H_5FO_2$ : 164.0274, found: 164.0265.

*Anal.* Calcd. for  $C_9H_5FO_2$ : C, 65.86; H, 3.07; F, 11.57; O, 19.50. Found: C, 65.92; H, 3.23.

### 3-(4-Chlorophenyl)-2-propynoic acid (2g)

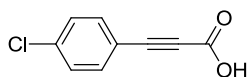

Colorless plate (recrystallized from CH<sub>3</sub>CN), mp 184–185 °C.

IR (neat): 2210, 1690, 1685, 1601, 1597, 1490, 1293, 1211, 1805, 1105 cm<sup>-1</sup>.

<sup>1</sup>H NMR (400 MHz, acetone-d<sub>6</sub>) δ (ppm): 7.56–7.58 (m, 2H), 7.69–7.72 (m, 2H).

<sup>13</sup>C{<sup>1</sup>H} NMR (150 MHz, CD<sub>3</sub>OD) δ (ppm): 83.9, 86.1, 120.8, 131.3, 136.4, 139.1, 157.4.

LRMS (EI) *m/z*: 180 (M<sup>+</sup>). HRMS: Calcd. For C<sub>9</sub>H<sub>5</sub>ClO<sub>2</sub>: 179.9978, found: 179.9964.

*Anal.* Calcd. for C<sub>9</sub>H<sub>5</sub>ClO<sub>2</sub>: C, 59.86; H, 2.79; Cl, 19.63; O, 17.72. Found: C, 59.66; H, 2.78.

### 3-(4-Bromophenyl)-2-propynoic acid (2h)

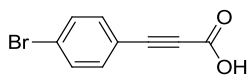

Colorless plate (recrystallized from CH<sub>3</sub>CN), mp 193–195 °C.

IR (neat): 2208, 1696, 1616, 1596, 1577, 1488, 1379, 1292, 1211, 1010 cm<sup>-1</sup>.

<sup>1</sup>H NMR (400 MHz, acetone-d<sub>6</sub>) δ (ppm): 7.61–7.65 (m, 2H), 7.71–7.74 (m, 2H).

<sup>13</sup>C{<sup>1</sup>H} NMR (150 MHz, CD<sub>3</sub>OD) δ (ppm): 83.8, 86.1, 121.1, 127.2, 134.2, 136.4, 157.3.

LRMS (EI) *m/z*: 224 (M<sup>+</sup>). HRMS: Calcd. For C<sub>9</sub>H<sub>5</sub>BrO<sub>2</sub>: 223.9473, found: 223.9482.

*Anal.* Calcd. for C<sub>9</sub>H<sub>5</sub>BrO<sub>2</sub>: C, 48.03; H, 2.24; Br, 35.51; O, 14.22. Found: C, 47.99; H, 2.39.

### 3-(4-Trifluoromethylphenyl)-2-propynoic acid (2i)

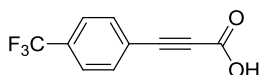

Colorless needle (recrystallized from hexane/acetone), mp 155–156 °C.

IR (neat): 2227, 1718, 1671, 1406, 1266, 1203, 1104, 857 cm<sup>-1</sup>.

<sup>1</sup>H NMR (400 MHz, acetone-d<sub>6</sub>) δ (ppm): 7.87–7.93 (m, 4H).

<sup>13</sup>C{<sup>1</sup>H} NMR (150 MHz, acetone-d<sub>6</sub>) δ (ppm): 84.5, 84.8, 125.8, 125.9 (q, *J* = 271.5 Hz), 127.7 (d, *J* = 4.5 Hz), 133.5 (q, *J* = 33.0 Hz), 135.3, 155.2.

LRMS (EI) *m/z*: 214 (M<sup>+</sup>). HRMS: Calcd. For C<sub>10</sub>H<sub>5</sub>F<sub>3</sub>O<sub>2</sub>: 214.0242, found: 214.0217.

### 3-(4-Cyanophenyl)-2-propynoic acid (2j)

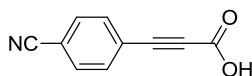

Yellow needle. Sublimation

IR (neat): 2230, 2203, 1684, 1593, 1373, 1329 cm<sup>-1</sup>.

$^1\text{H}$  NMR (600 MHz, acetone- $d_6$ )  $\delta$  (ppm): 7.88–7.90 (m, 2H), 7.94–7.96 (m, 2H).

$^{13}\text{C}\{^1\text{H}\}$  NMR (100 MHz, acetone- $d_6$ )  $\delta$  (ppm): 84.2, 85.1, 115.5, 119.3, 125.8, 134.2, 134.9, 154.8.

LRMS (EI)  $m/z$ : 171 ( $\text{M}^+$ ). HRMS: Calcd. For  $\text{C}_{10}\text{H}_5\text{NO}_2$ : 171.0320, found: 171.0307.

*Anal.* Calcd. for  $\text{C}_{10}\text{H}_5\text{NO}_2$ : C, 70.18; H, 2.94; N, 8.18; O, 18.70. Found: C, 70.20; H, 3.06; N, 8.30.

### 3-(4-Nitrophenyl)-2-propynoic acid (2k)

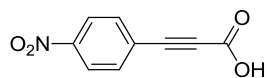

Yellow needle (recrystallized from AcOEt/hexane), mp 195–196 °C.

IR (neat): 2206, 1684, 1603, 1591, 1522, 1343, 1284, 1207, 858, 853, 748  $\text{cm}^{-1}$ .

$^1\text{H}$  NMR (400 MHz, acetone- $d_6$ )  $\delta$  (ppm): 7.96–7.99 (m, 2H), 8.36–8.40 (m, 2H).

$^{13}\text{C}\{^1\text{H}\}$  NMR (100 MHz,  $\text{CD}_3\text{OD}$ )  $\delta$  (ppm): 84.3, 86.3, 125.8 (d,  $J = 17.0$  Hz), 128.5, 135.8 (d,  $J = 17.0$  Hz), 151.0, 156.7.

LRMS (EI)  $m/z$ : 191 ( $\text{M}^+$ ). HRMS: Calcd. For  $\text{C}_9\text{H}_5\text{NO}_4$ : 191.0219, found: 191.0217.

### 3-(4-Ethoxycarbonylphenyl)-2-propynoic acid (2l)

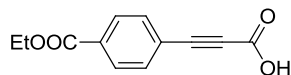

Colorless plate (recrystallized from  $\text{CH}_3\text{CN}$ ), mp 131–134 °C.

IR (neat): 2231, 1689, 1318, 1279, 1125, 1106, 1065, 845, 834  $\text{cm}^{-1}$ .

$^1\text{H}$  NMR (600 MHz, acetone- $d_6$ )  $\delta$  (ppm): 1.42 (t,  $J = 7.2$  Hz, 3H), 4.42 (d,  $J = 7.2$  Hz, 2H), 7.81 (d,  $J = 8.4$  Hz, 2H), 8.13 (d,  $J = 8.4$  Hz, 2H).

$^{13}\text{C}\{^1\text{H}\}$  NMR (150 MHz, acetone- $d_6$ )  $\delta$  (ppm): 15.3, 62.7, 84.4, 85.2, 125.6, 131.2, 133.9, 134.4, 154.9, 166.6.

LRMS (EI)  $m/z$ : 218 ( $\text{M}^+$ ). HRMS: Calcd. For  $\text{C}_{12}\text{H}_{10}\text{O}_4$ : 218.0579, found: 218.0563.

*Anal.* Calcd. for  $\text{C}_{12}\text{H}_{10}\text{O}_4$ : C, 66.05; H, 4.62; O, 29.33. Found: C, 66.05; H, 4.62.

### 3-(1-naphthyl)-2-propynoic acid (2c)

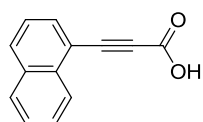

Colorless prism (recrystallized from AcOEt/petroleum ether), mp 140–142 °C.

IR (neat): 2197, 1669, 1414, 1297, 1262, 1221, 1210  $\text{cm}^{-1}$ .

$^1\text{H}$  NMR (600 MHz,  $\text{CDCl}_3/\text{TMS}$ )  $\delta$  (ppm): 7.48–7.51 (m, 1H), 7.57–7.60 (m, 1H), 7.64–7.67 (m, 1H), 7.89–7.91 (m, 2H), 7.99 (d,  $J = 8.2$  Hz, 1H), 8.35 (d,  $J = 8.3$  Hz, 1H).

$^{13}\text{C}\{^1\text{H}\}$  NMR (150 MHz,  $\text{CDCl}_3$ )  $\delta$  (ppm): 84.7, 87.6, 116.6, 125.1, 125.6, 127.0, 127.9, 128.5, 131.9, 133.0, 133.6, 133.7, 158.8.

LRMS (EI)  $m/z$ : 196 ( $\text{M}^+$ ). HRMS: Calcd. For  $\text{C}_{13}\text{H}_8\text{O}_3$ : 196.0524, found: 196.0508.

### 3-(2-Thienyl)-2-propynoic acid (2n)

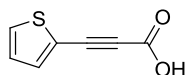

Colorless prism (recrystallized from hexane/AcOEt), mp 138–140 °C.

IR (neat): 2198, 1663, 1399, 1276, 1222, 1176, 884, 854, 839, 711  $\text{cm}^{-1}$ .

$^1\text{H}$  NMR (600 MHz,  $\text{CDCl}_3/\text{TMS}$ )  $\delta$  (ppm): 7.07–7.09 (m, 1H), 7.51–7.55 (m, 2H).

$^{13}\text{C}\{^1\text{H}\}$  NMR (150 MHz, acetone- $d_6$ )  $\delta$  (ppm): 80.5, 86.7, 120.6, 129.6, 133.5, 138.3, 155.1..

LRMS (EI)  $m/z$ : 151 ( $\text{M}^+$ ). HRMS: Calcd. For  $\text{C}_7\text{H}_4\text{O}_2\text{S}$ : 151.9932, found: 151.9920.

### 2-nonynoic acid (2p)

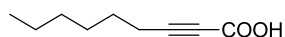

Colorless oil

IR (neat): 2237, 1684, 1277  $\text{cm}^{-1}$ .

$^1\text{H}$  NMR (400 MHz,  $\text{CDCl}_3/\text{TMS}$ )  $\delta$  (ppm): 0.89 (t,  $J = 6.8$  Hz, 3H), 1.26–1.44 (m, 6H), 1.55–1.62 (m, 2H), 2.36 (t,  $J = 6.8$  Hz, 2H).

$^{13}\text{C}\{^1\text{H}\}$  NMR (150 MHz,  $\text{CDCl}_3$ )  $\delta$  (ppm): 13.9, 18.7, 22.4, 27.3, 28.5, 31.1, 72.6, 92.8, 158.6.

LRMS (EI)  $m/z$ : 153 ( $\text{M}^+ - 1$ ). HRMS: Calcd. For  $\text{C}_9\text{H}_{13}\text{O}_2$ : 153.0916, found: 153.0913.

### 4,4-Dimethyl-2-pentynoic acid (2q)

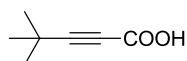

Yellow oil.

IR (neat): 2216, 1696, 1684, 1261, 1220, 1101, 947, 818  $\text{cm}^{-1}$ .

$^1\text{H}$  NMR (400 MHz,  $\text{CDCl}_3/\text{TMS}$ )  $\delta$  (ppm): 1.30 (s, 9H).

$^{13}\text{C}\{^1\text{H}\}$  NMR (150 MHz,  $\text{CDCl}_3$ )  $\delta$  (ppm): 29.8, 39.7, 71.6, 98.5, 157.5.

LRMS (EI)  $m/z$ : 125 ( $\text{M}^+ - 1$ ). HRMS: Calcd. For  $\text{C}_7\text{H}_9\text{O}_2$ : 125.0603, found: 126.0590.

### Methyl 3-(3-pyridinyl)-2-propynoate (3o)

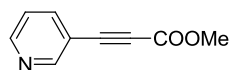

Yellow plate (recrystallized from petroleum ether), mp 52–53 °C.

IR (neat): 2228, 1696, 1474, 1438, 1296, 1207, 1176  $\text{cm}^{-1}$ .

$^1\text{H}$  NMR (400 MHz,  $\text{CDCl}_3/\text{TMS}$ )  $\delta$  (ppm): 3.86 (s, 3H), 7.31–7.35 (m, 1H), 7.86–7.88 (m, 1H), 8.65–8.67 (m, 1H), 8.81–8.81 (m, 1H).

$^{13}\text{C}\{^1\text{H}\}$  NMR (150 MHz,  $\text{CDCl}_3$ )  $\delta$  (ppm): 53.0, 82.7, 83.2, 116.9, 123.2, 139.8, 150.7, 153.3, 153.9.

LRMS (EI)  $m/z$ : 161 ( $\text{M}^+$ ). HRMS: Calcd. For  $\text{C}_9\text{H}_7\text{NO}_2$ : 161.0477, found: 161.0465.

### Methyl 3-phenyl-2-propynoate (3aa)

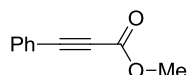

yellow oil

IR (neat): 2224, 1707, 1490, 1434, 1285, 1199, 1169, 756  $\text{cm}^{-1}$ .

$^1\text{H}$  NMR (400 MHz,  $\text{CDCl}_3/\text{TMS}$ )  $\delta$  (ppm): 3.84 (s, 3H), 7.35–7.40 (m, 2H), 7.43–7.48 (m, 1H), 7.56–7.60 (m, 2H).

$^{13}\text{C}\{^1\text{H}\}$  NMR (100 MHz,  $\text{CDCl}_3$ )  $\delta$  (ppm): 52.7, 80.3, 86.5, 119.5, 128.6, 130.7, 133.0, 154.4.

LRMS (EI)  $m/z$ : 160 ( $\text{M}^+$ ). HRMS: Calcd. For  $\text{C}_{10}\text{H}_8\text{O}_2$ : 160.0524, found: 160.0535.

### Allyl 3-phenyl-2-propynoate (3ab)

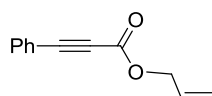

yellow oil

IR (neat): 2220, 1704, 1281, 1184, 1165, 755  $\text{cm}^{-1}$ .

$^1\text{H}$  NMR (400 MHz,  $\text{CDCl}_3/\text{TMS}$ )  $\delta$  (ppm): 4.74 (dt,  $J = 1.2, 5.8$  Hz, 2H), 5.32 (dd,  $J = 1.0, 10.2$  Hz, 2H), 5.41 (dd,  $J = 1.5, 17.1$  Hz, 2H), 5.93–6.03 (m, 1H), 7.36–7.40 (m, 2H), 7.43–7.46 (m, 1H), 7.58–7.60 (m, 2H).

$^{13}\text{C}\{^1\text{H}\}$  NMR (100 MHz,  $\text{CDCl}_3$ )  $\delta$  (ppm): 66.5, 80.4, 86.5, 119.4, 119.5, 128.6, 130.7, 131.2, 133.0, 153.7.

LRMS (EI)  $m/z$ : 186 ( $\text{M}^+$ ). HRMS: Calcd. For  $\text{C}_{12}\text{H}_{10}\text{O}_2$ : 186.0681, found: 186.0688.

### Benzyl 3-phenyl-2-propynoate (3ac)

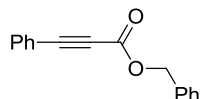

yellow oil

IR (neat): 2225, 1706, 1490, 1293, 1279, 1183, 1169, 756, 746  $\text{cm}^{-1}$ .

$^1\text{H}$  NMR (400 MHz,  $\text{CDCl}_3/\text{TMS}$ )  $\delta$  (ppm): 5.27 (s, 2H), 7.35–7.47 (m, 8H), 7.55–7.59 (m, 2H).

$^{13}\text{C}\{^1\text{H}\}$  NMR (100 MHz,  $\text{CDCl}_3$ )  $\delta$  (ppm): 67.7, 80.5, 86.7, 119.5, 128.5, 128.6, 128.7, 130.7, 133.0, 134.9, 153.9.



LRMS (EI)  $m/z$ : 236 ( $M^+$ ). HRMS: Calcd. For.  $C_{16}H_{12}O_2$ : 236.0837, found: 236.0829.

**Butyl 3-phenyl-2-propynoate (3ad)**

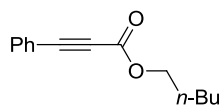

yellow oil

IR (neat): 2960, 2221, 1705, 1283, 1185, 1172, 756, 748  $cm^{-1}$

$^1H$  NMR (400 MHz,  $CDCl_3$ )  $\delta$  (ppm): 0.97 (t,  $J = 7.2$  Hz, 3H), 1.44 (sext,  $J = 7.2$  Hz, 2H), 1.71 (quint,  $J = 7.2$  Hz, 2H), 4.24 (t,  $J = 7.2$  Hz, 2H), 7.35–7.39 (m, 2H), 7.42–7.47 (m, 1H), 7.57–7.60 (m, 2H).

$^{13}C\{^1H\}$  NMR (100 MHz,  $CDCl_3$ )  $\delta$  (ppm): 13.6, 19.0, 30.5, 65.9, 80.7, 86.0, 119.7, 128.5, 130.5, 132.9, 154.2.

LRMS (EI)  $m/z$ : 202 ( $M^+$ ). HRMS: Calcd. For.  $C_{13}H_{14}O_2$ : 202.0994, found: 202.0990.

### 5. Copies of $^1\text{H}$ NMR and $^{13}\text{C}$ NMR spectra of products

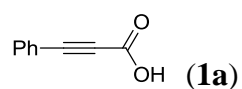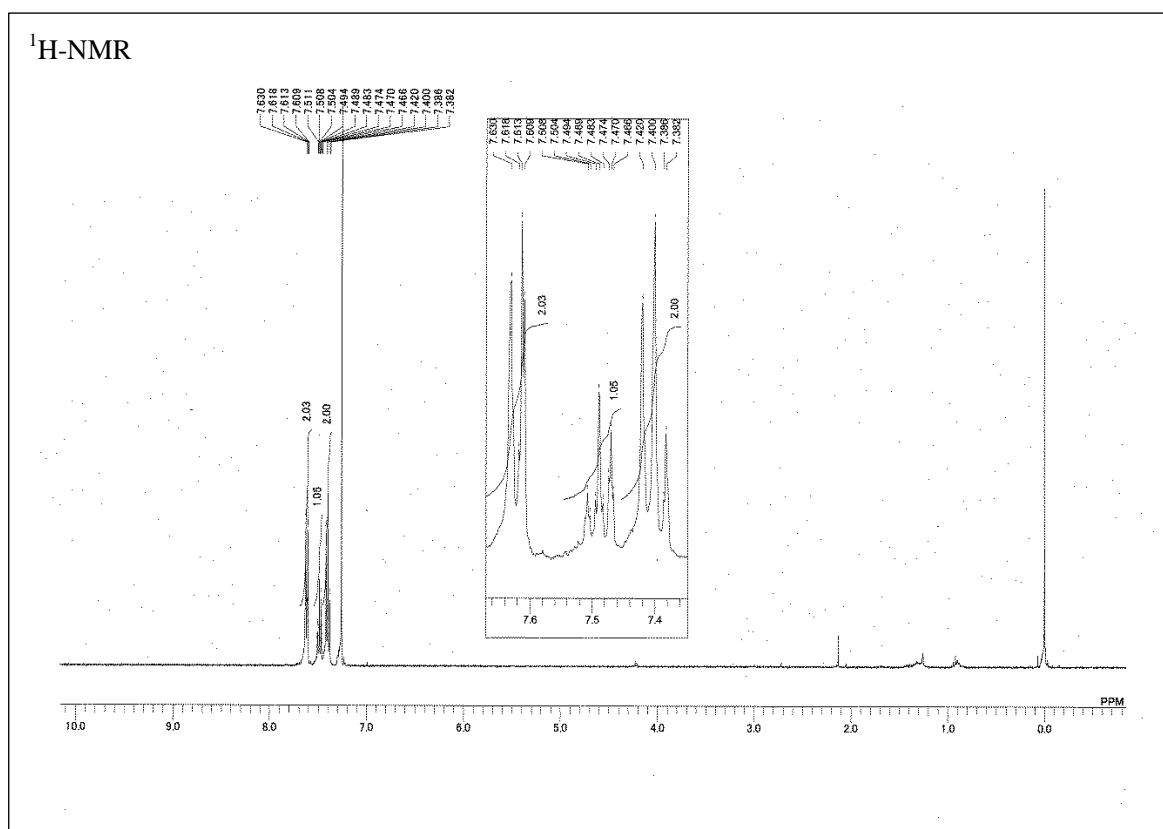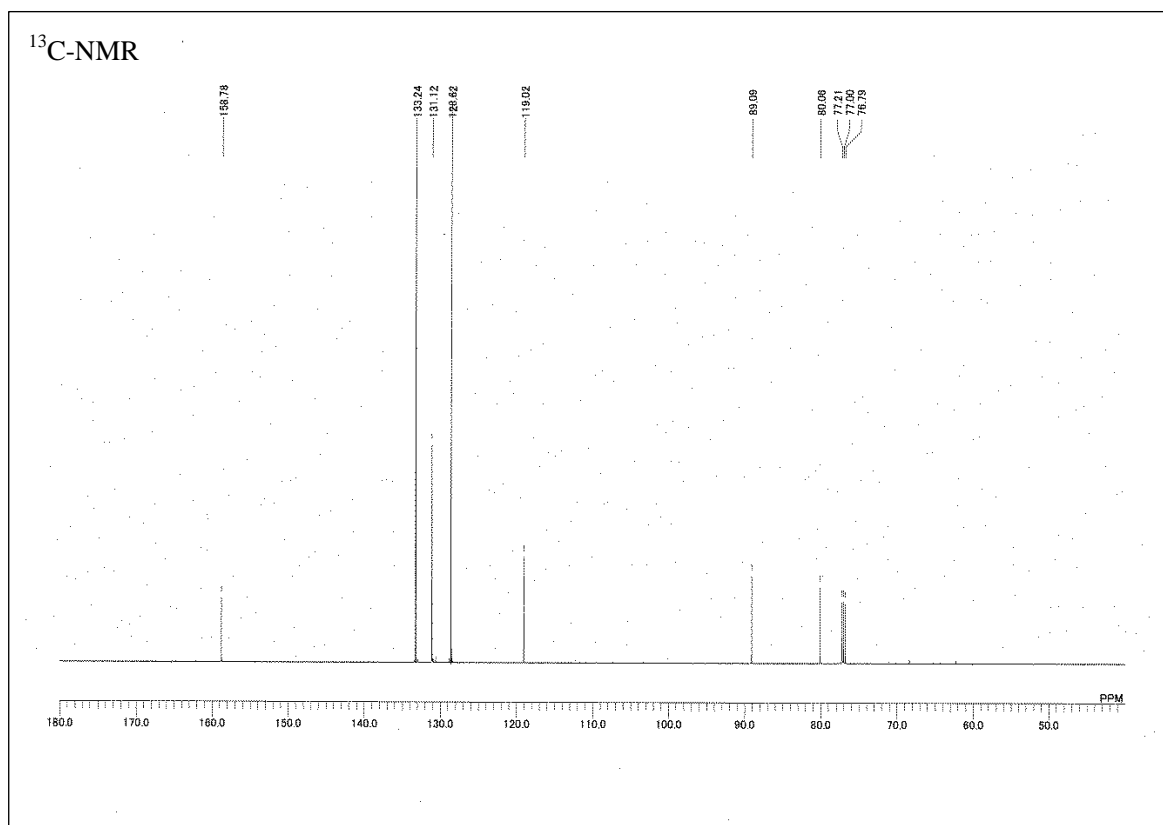

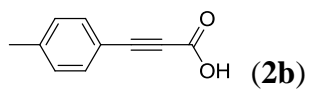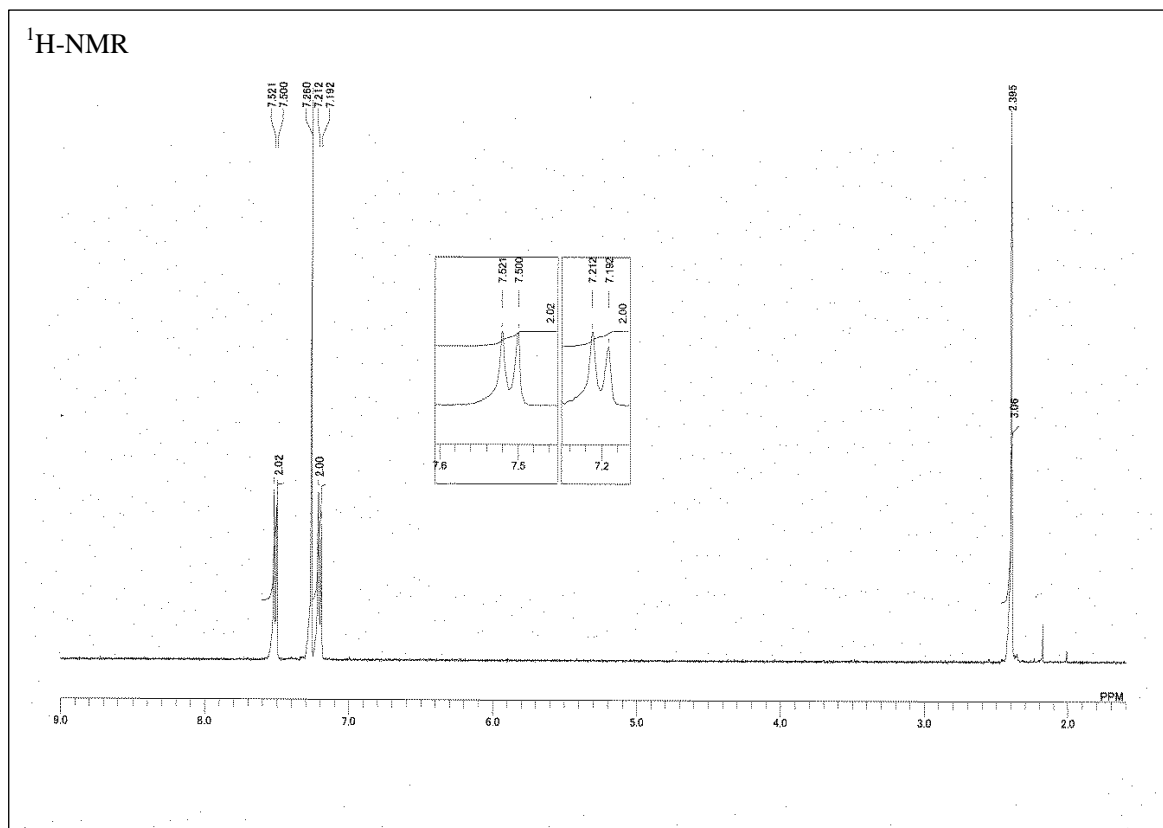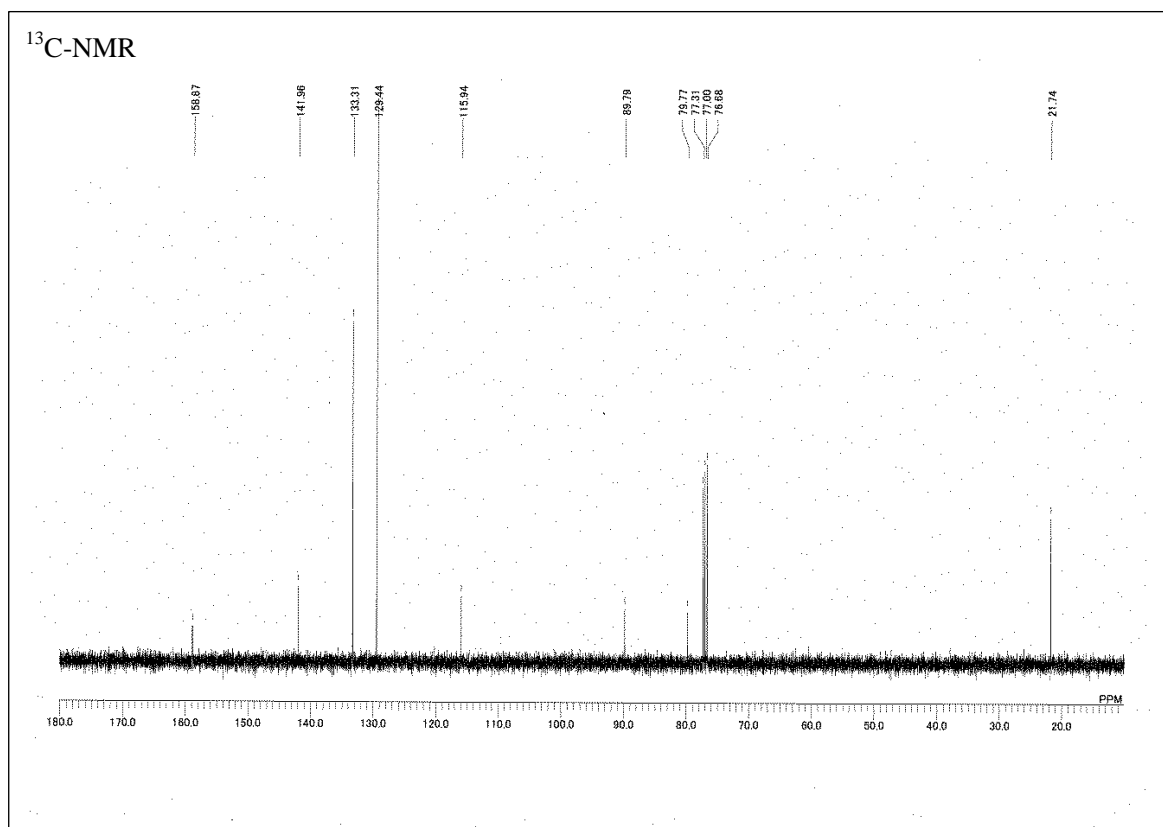

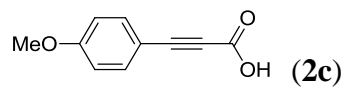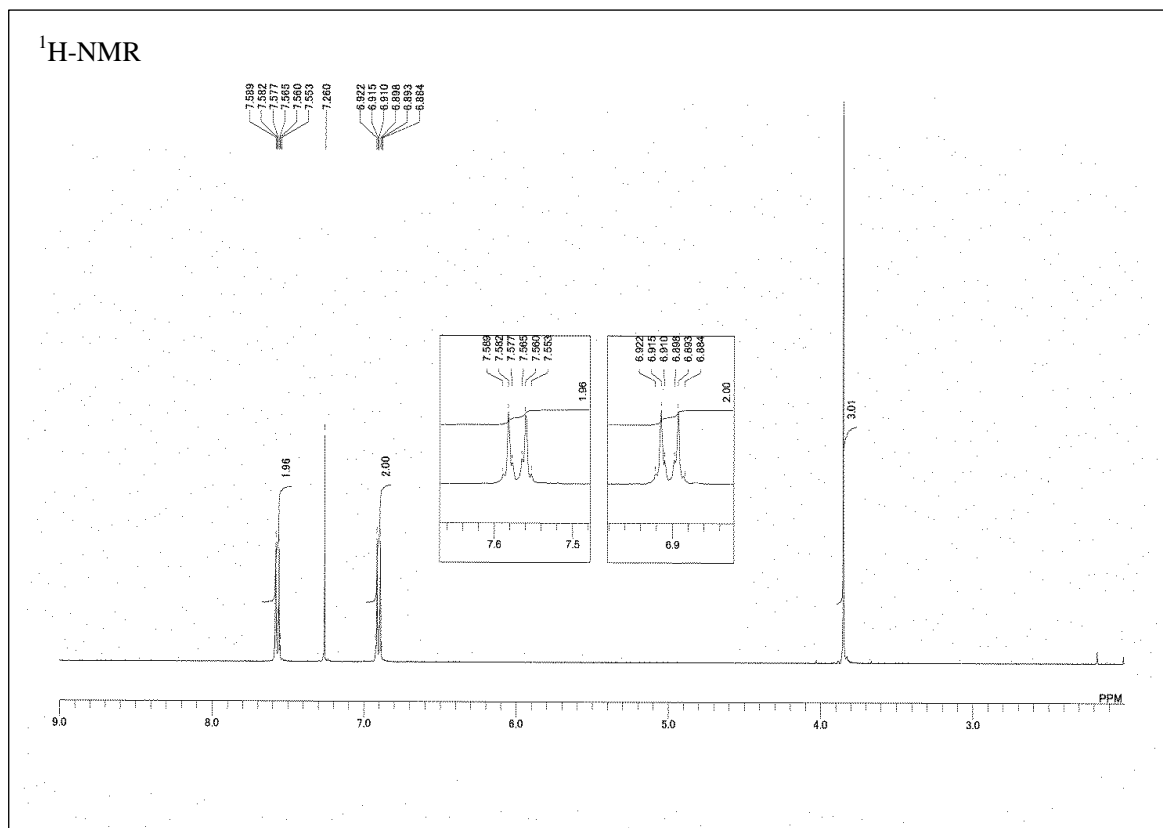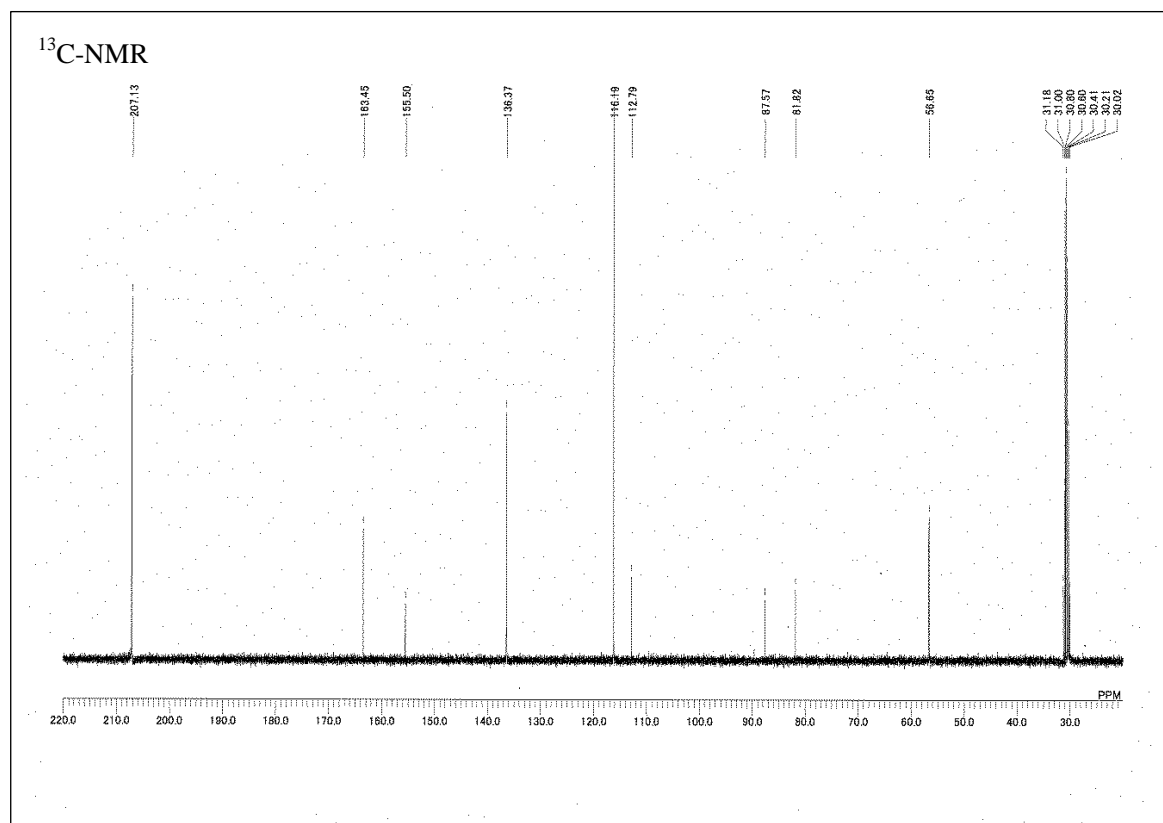

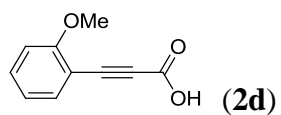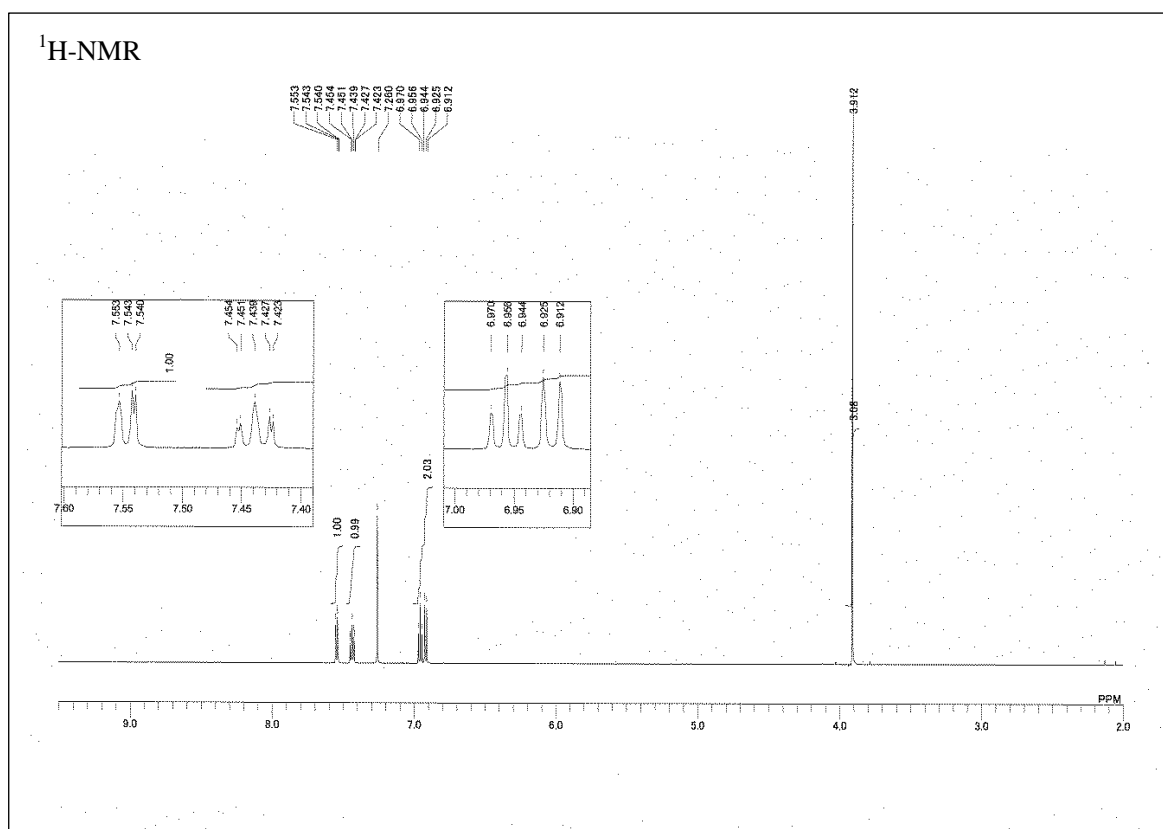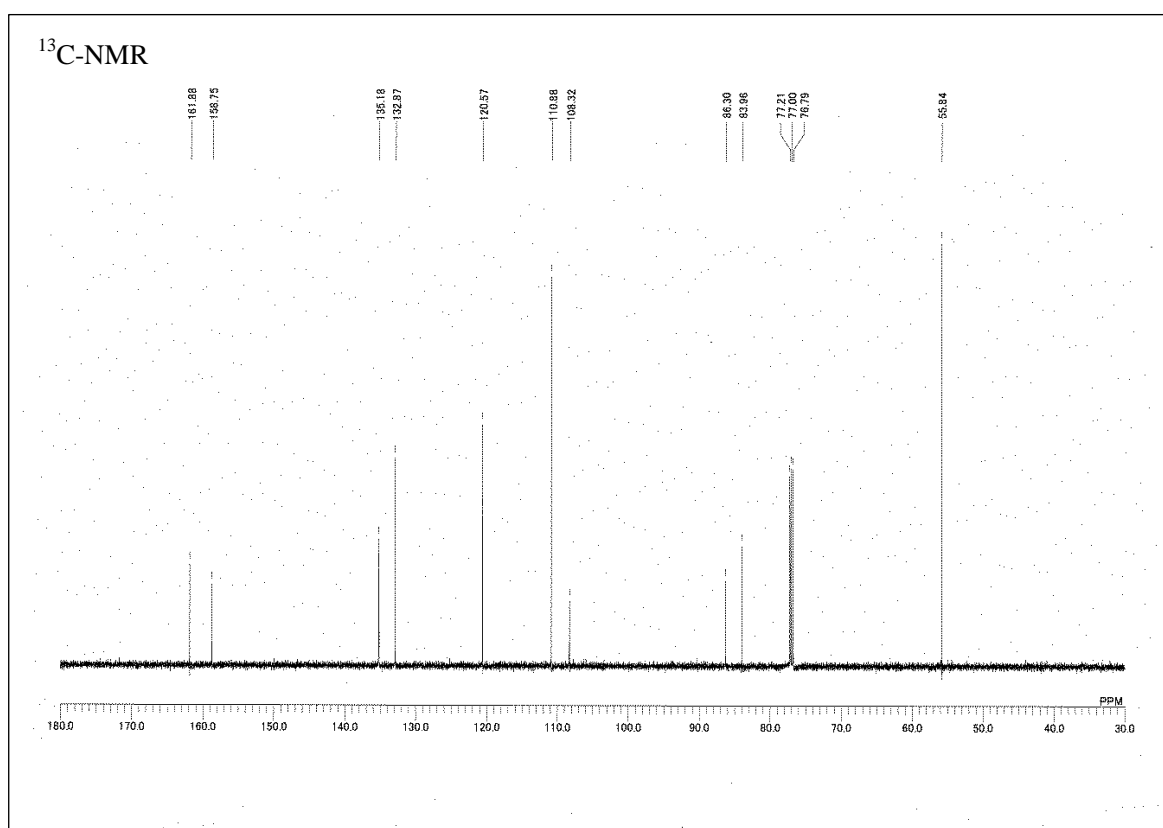

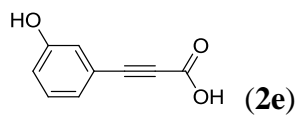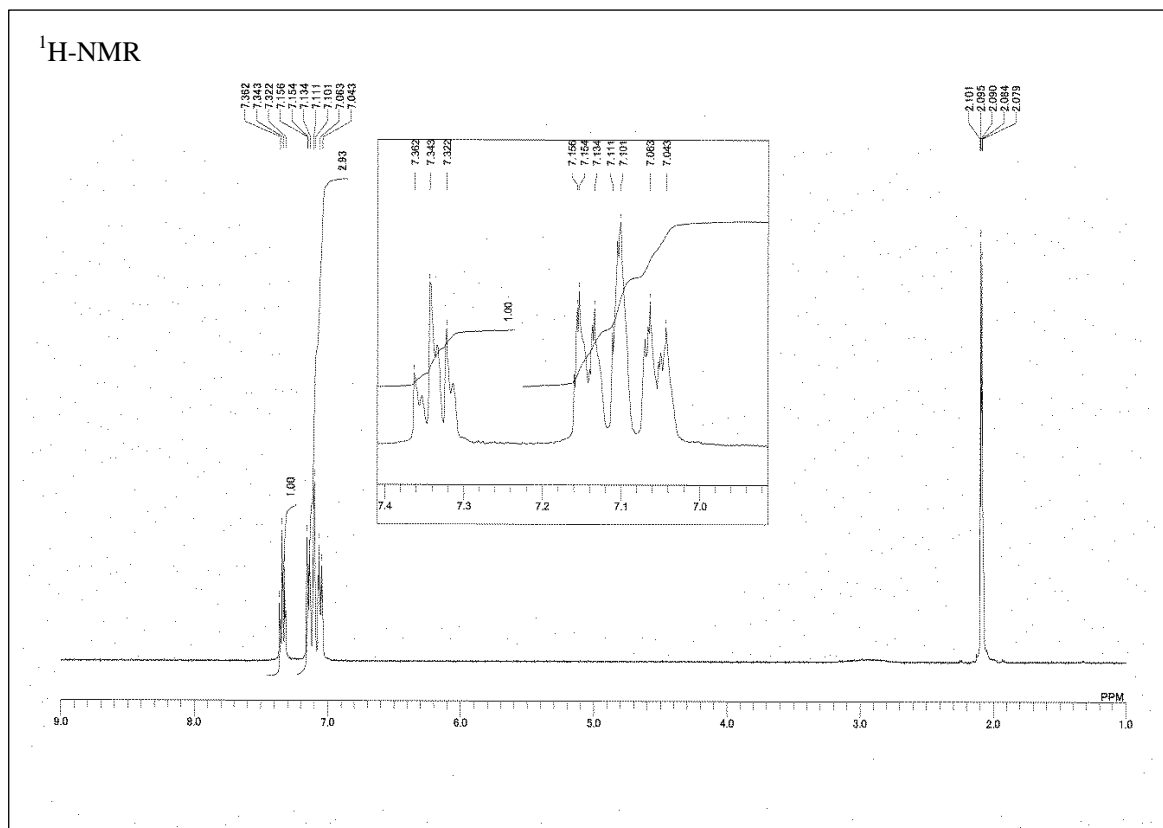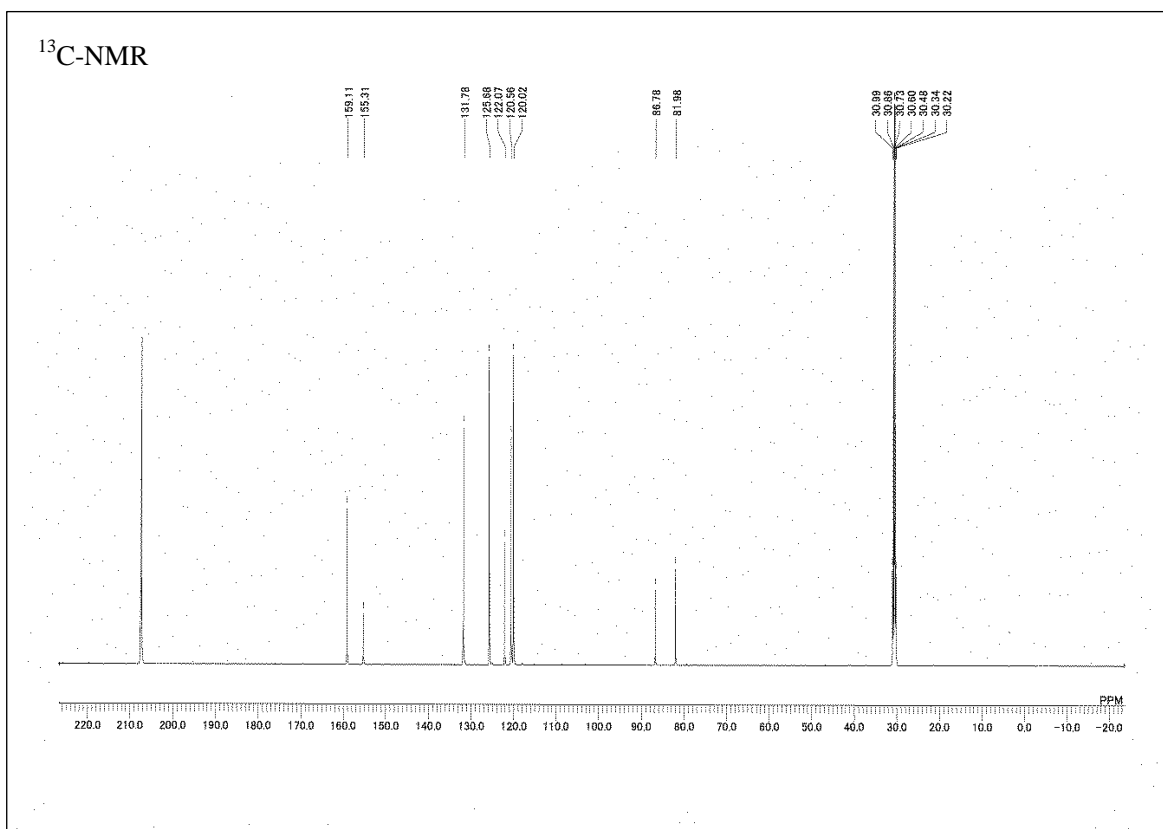

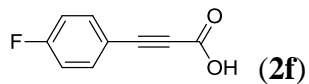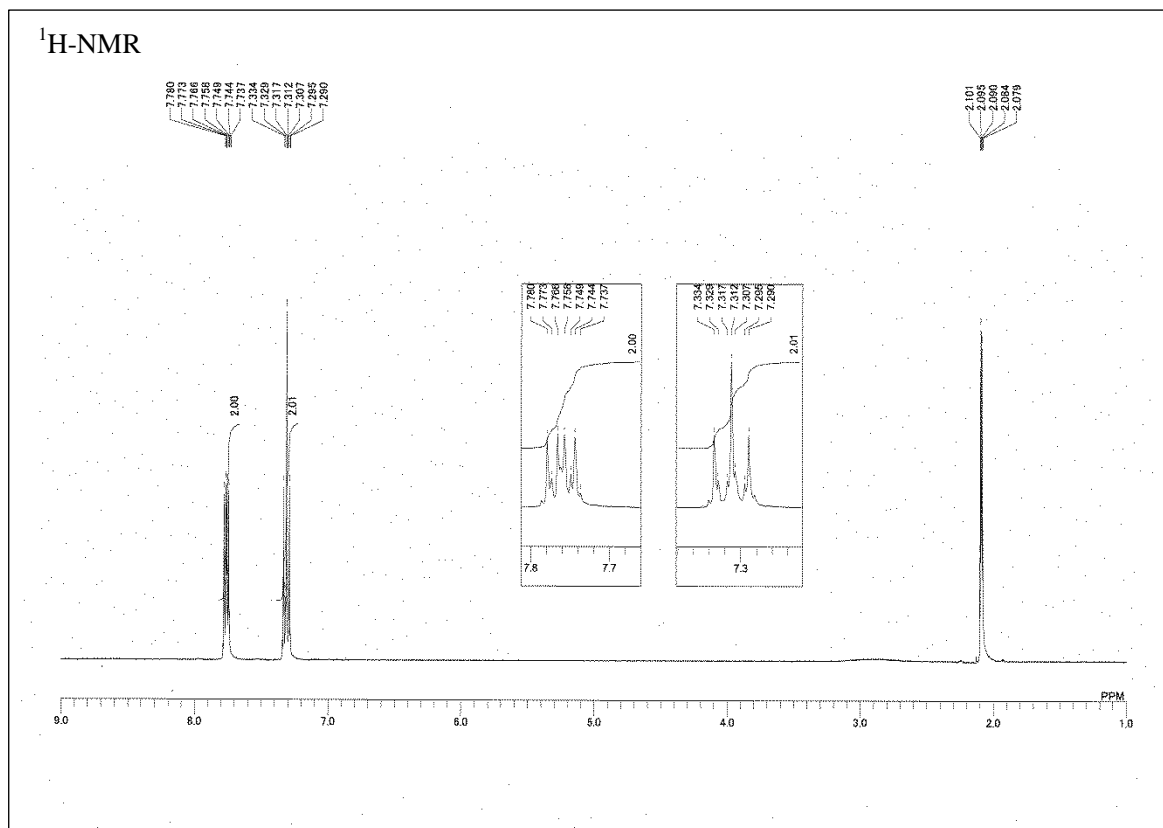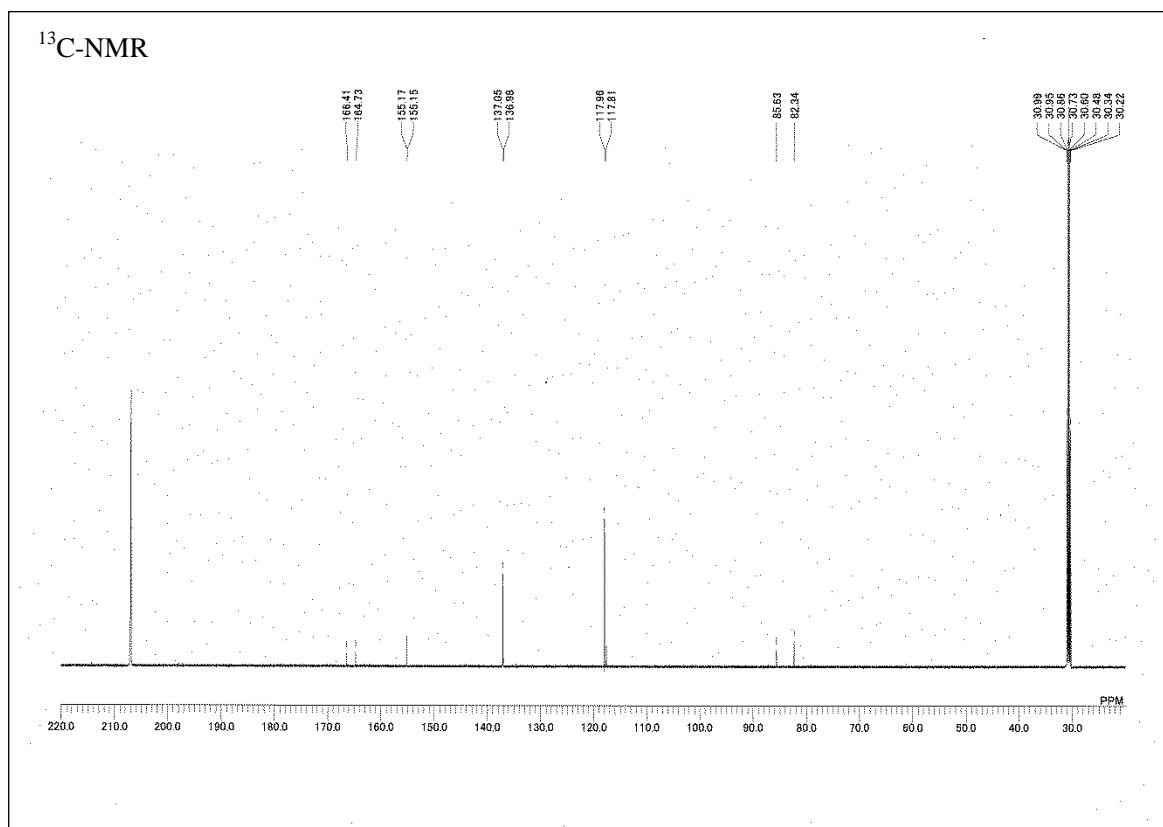

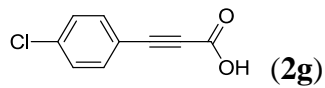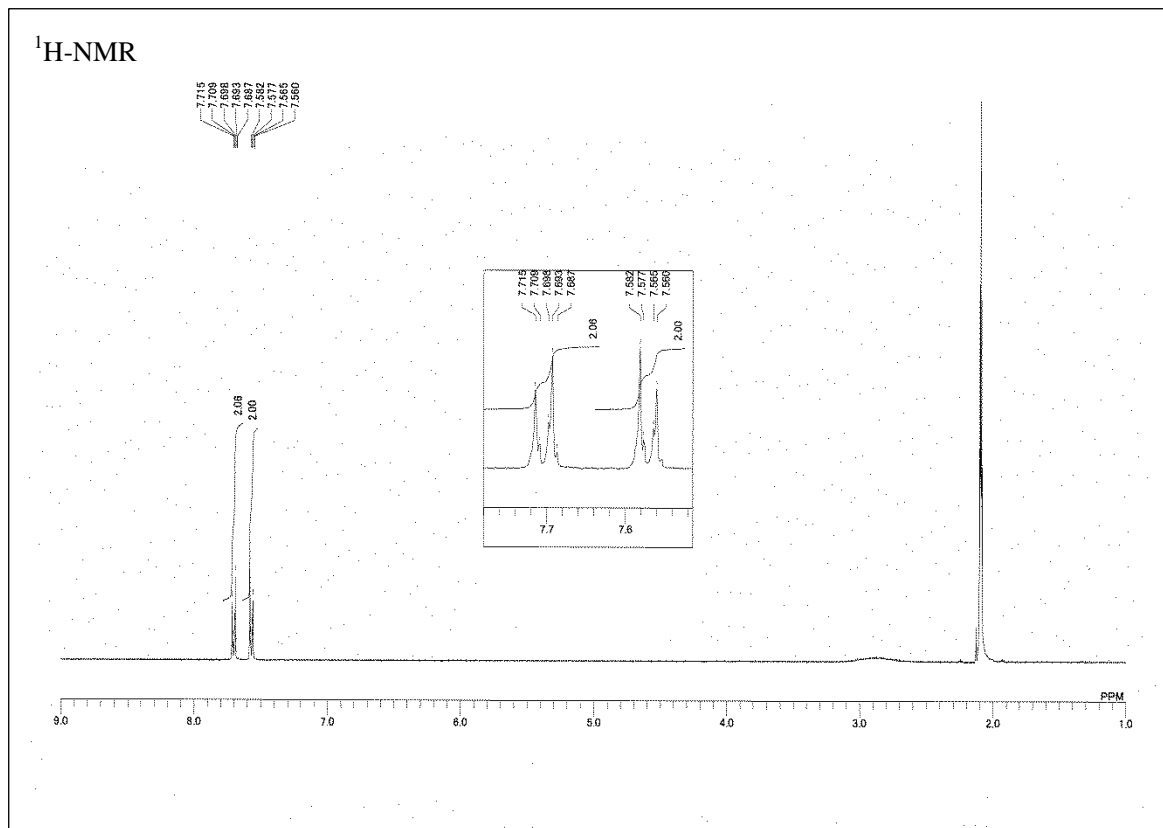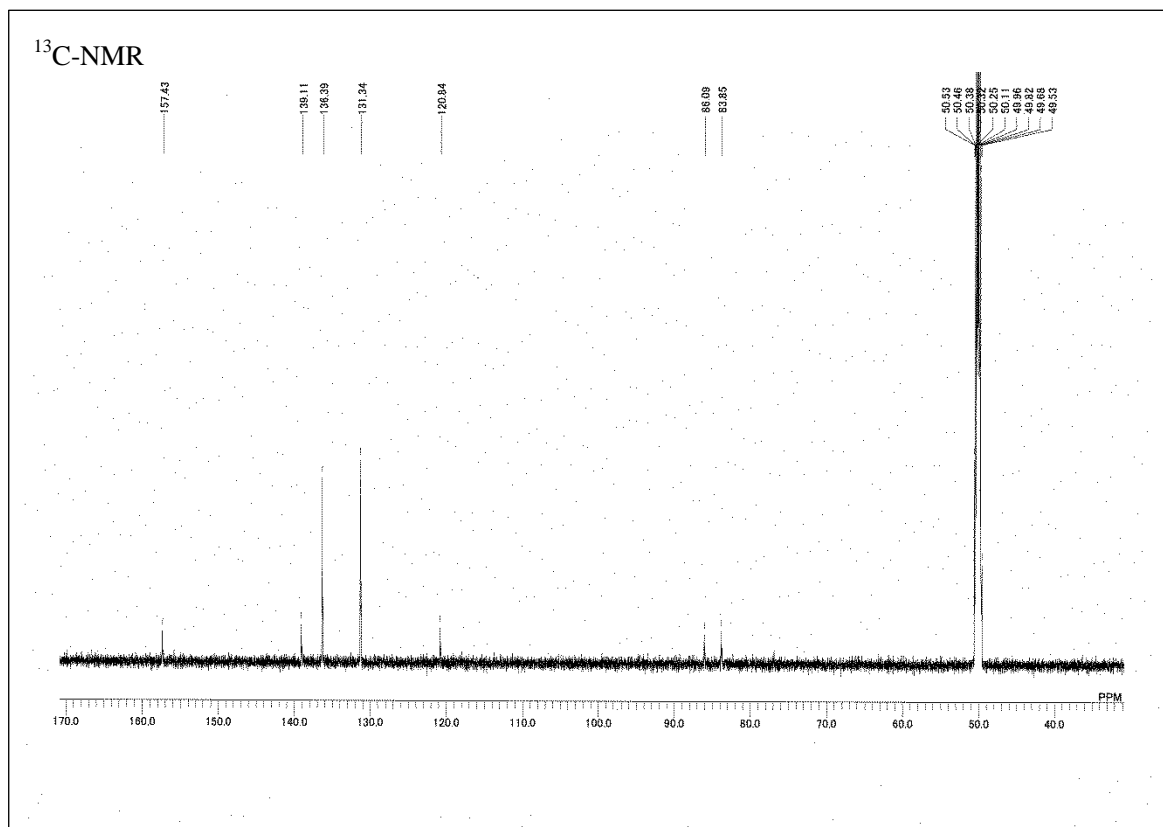



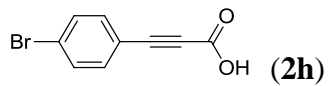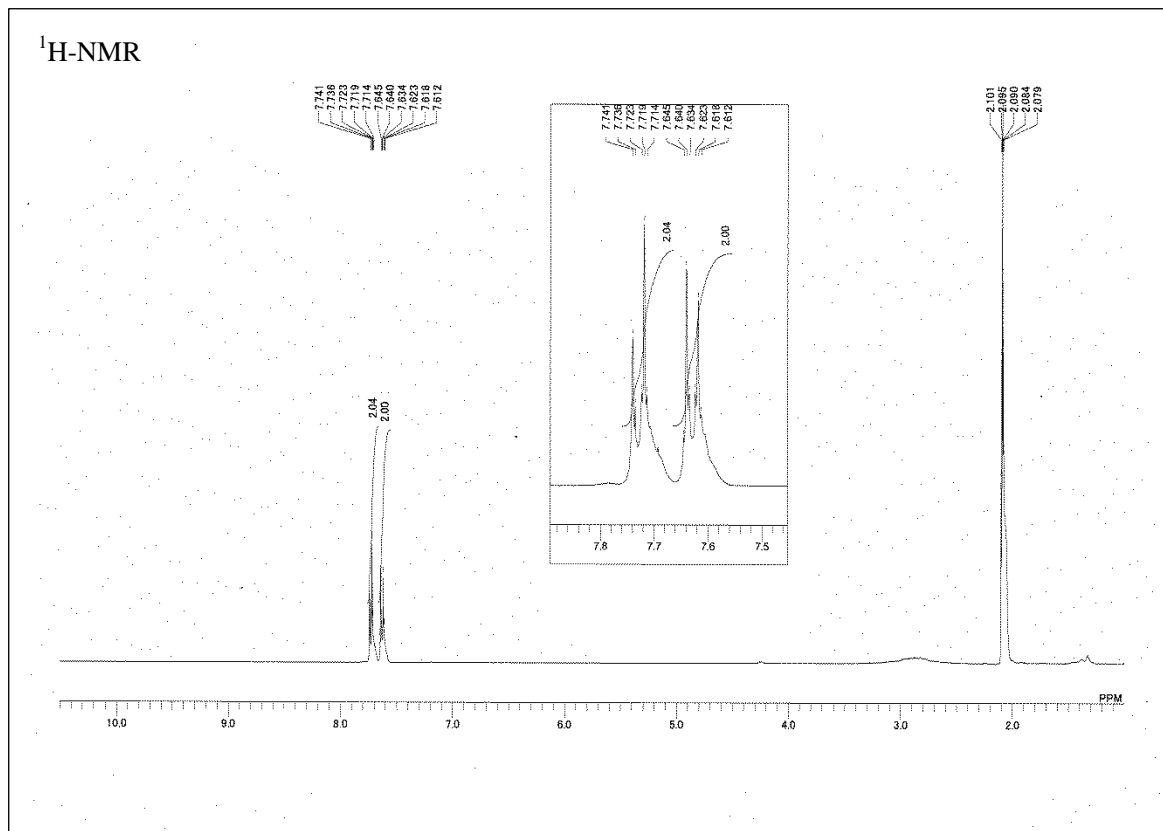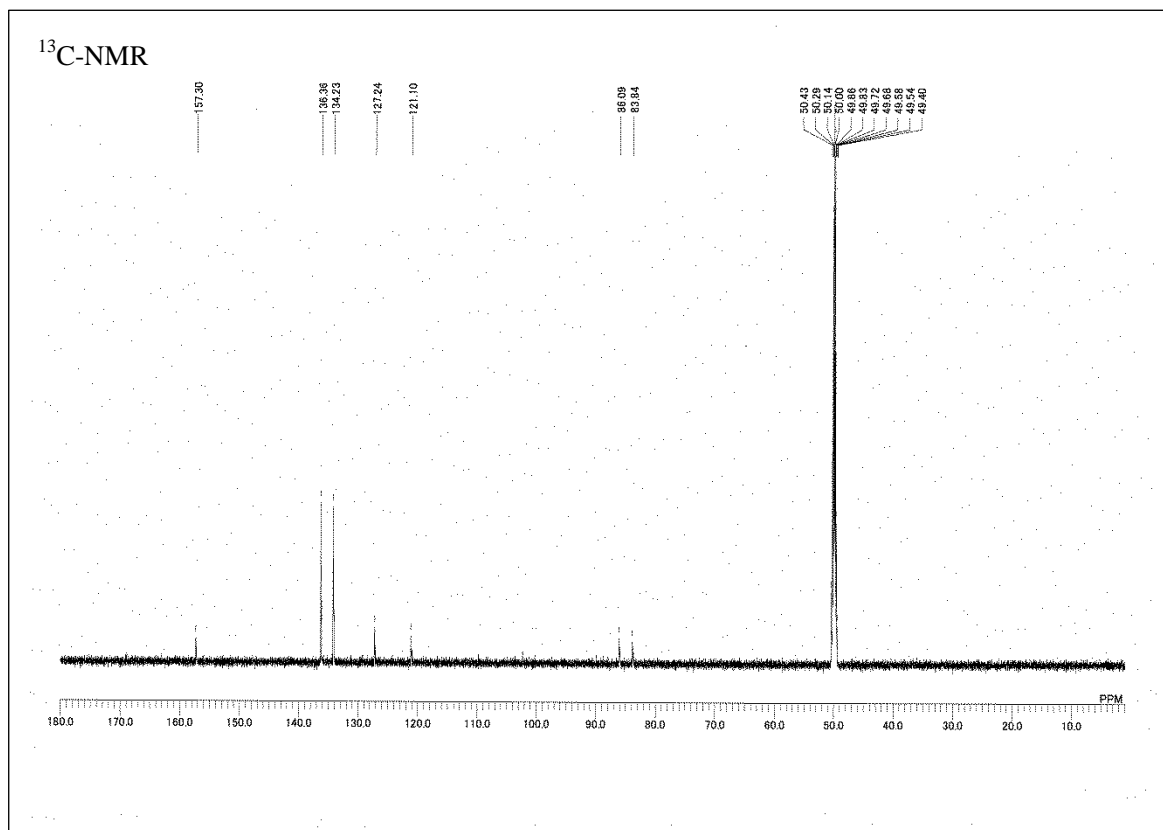

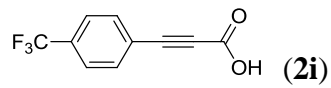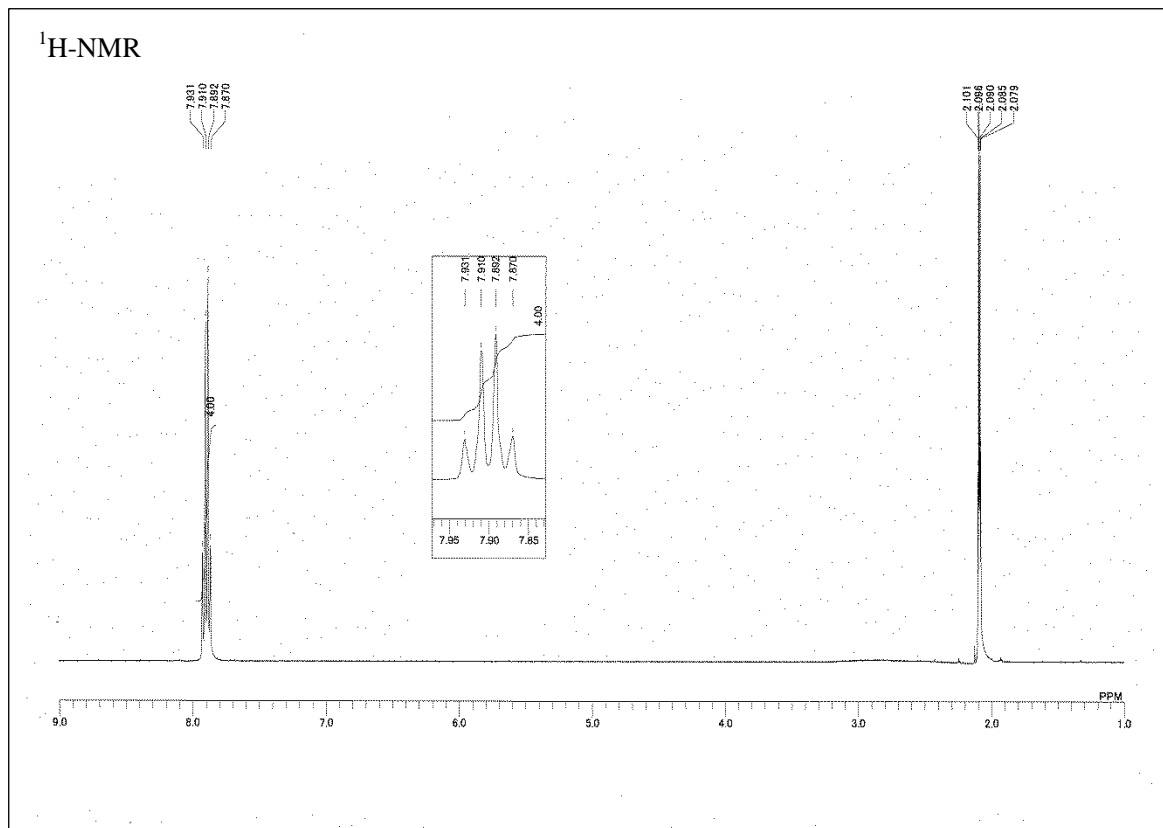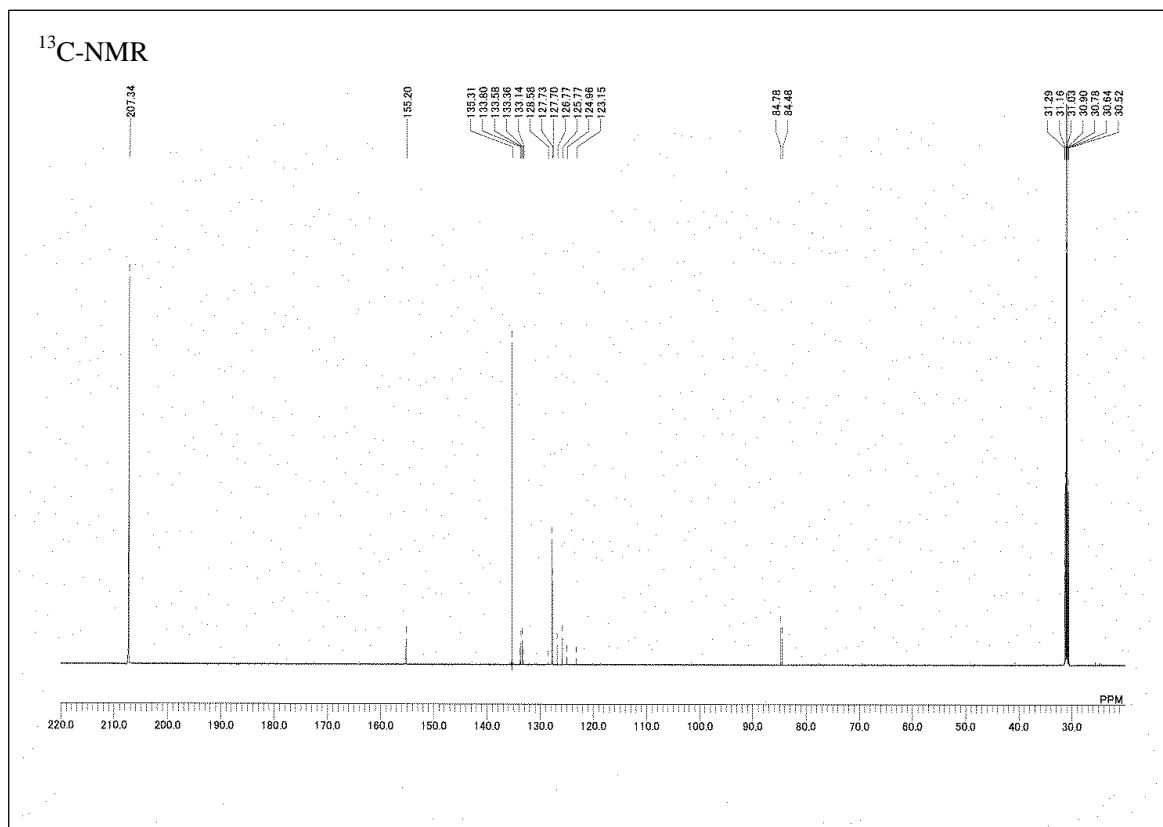

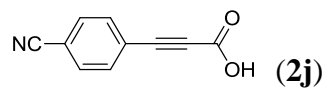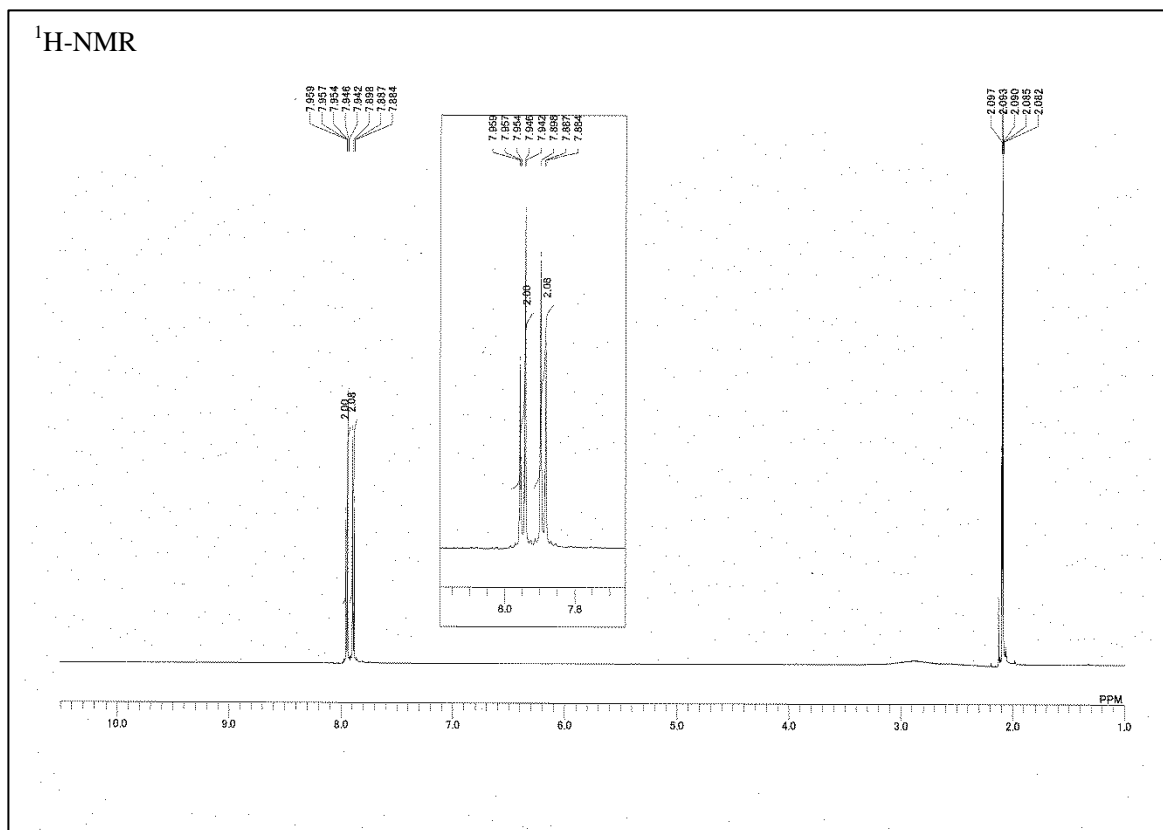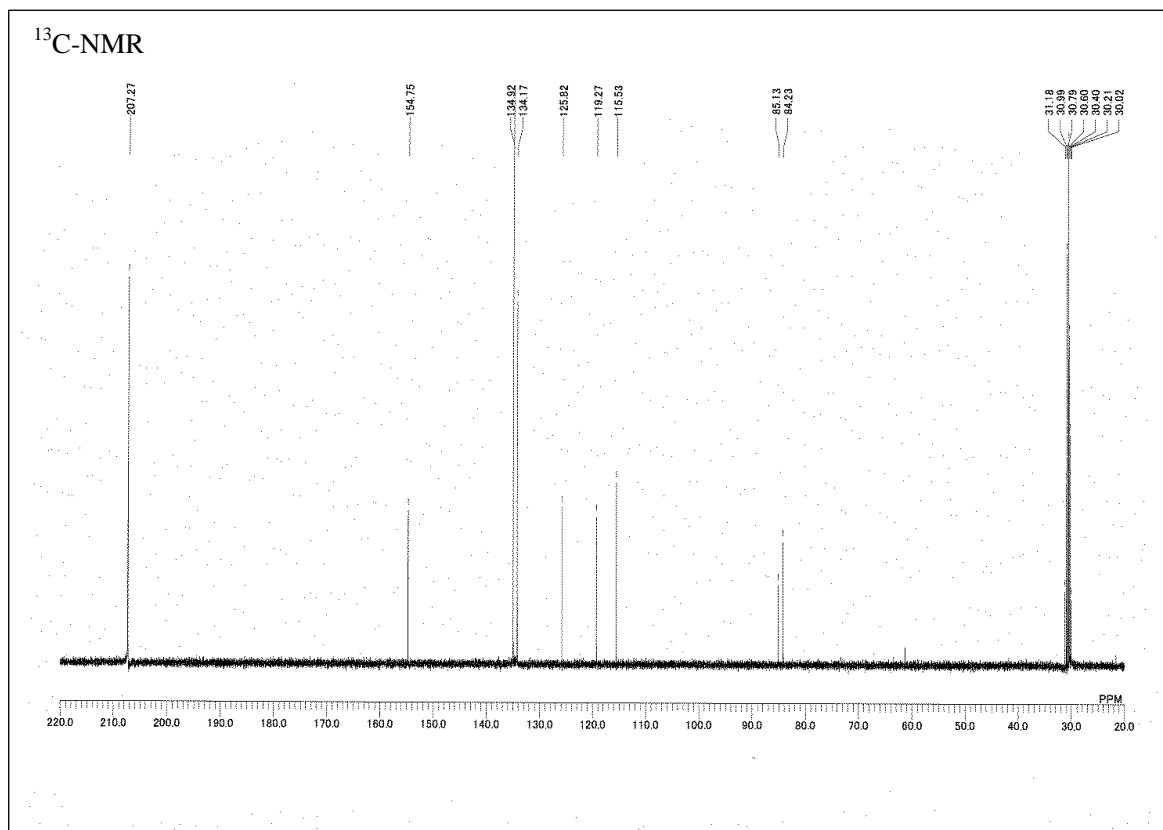

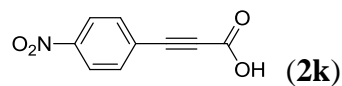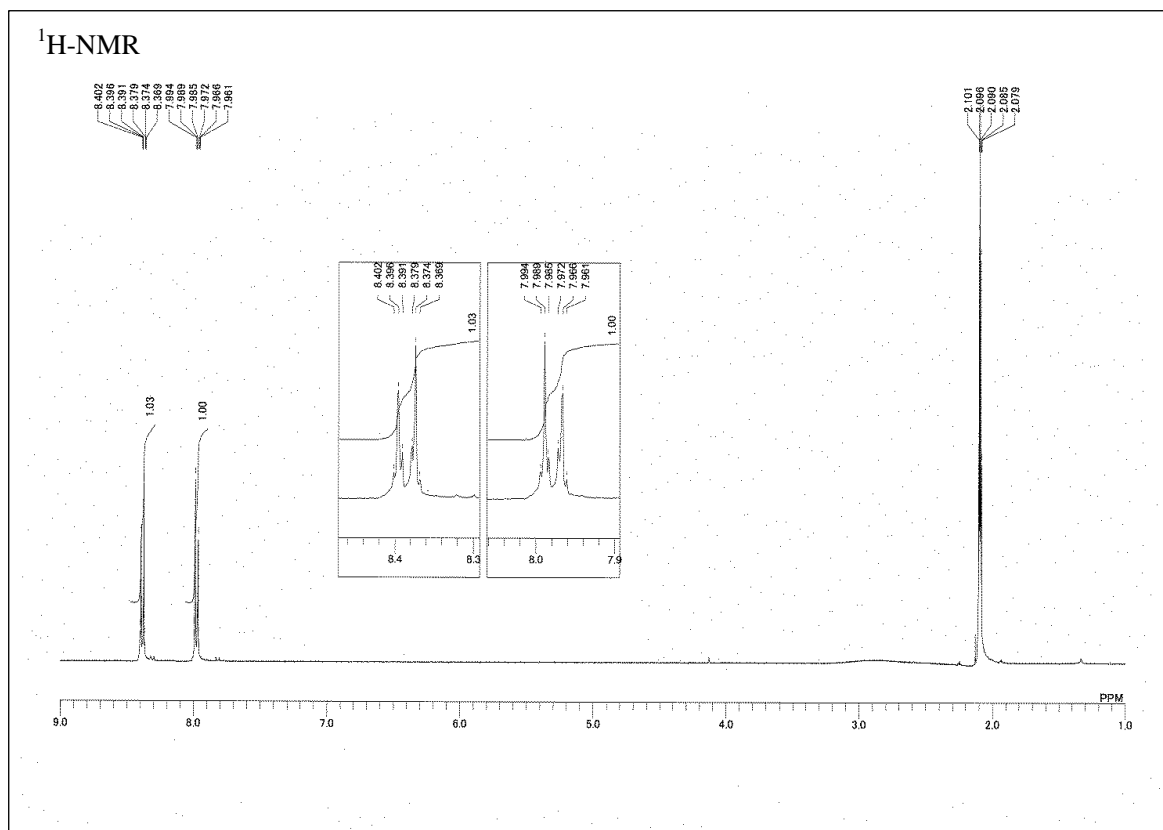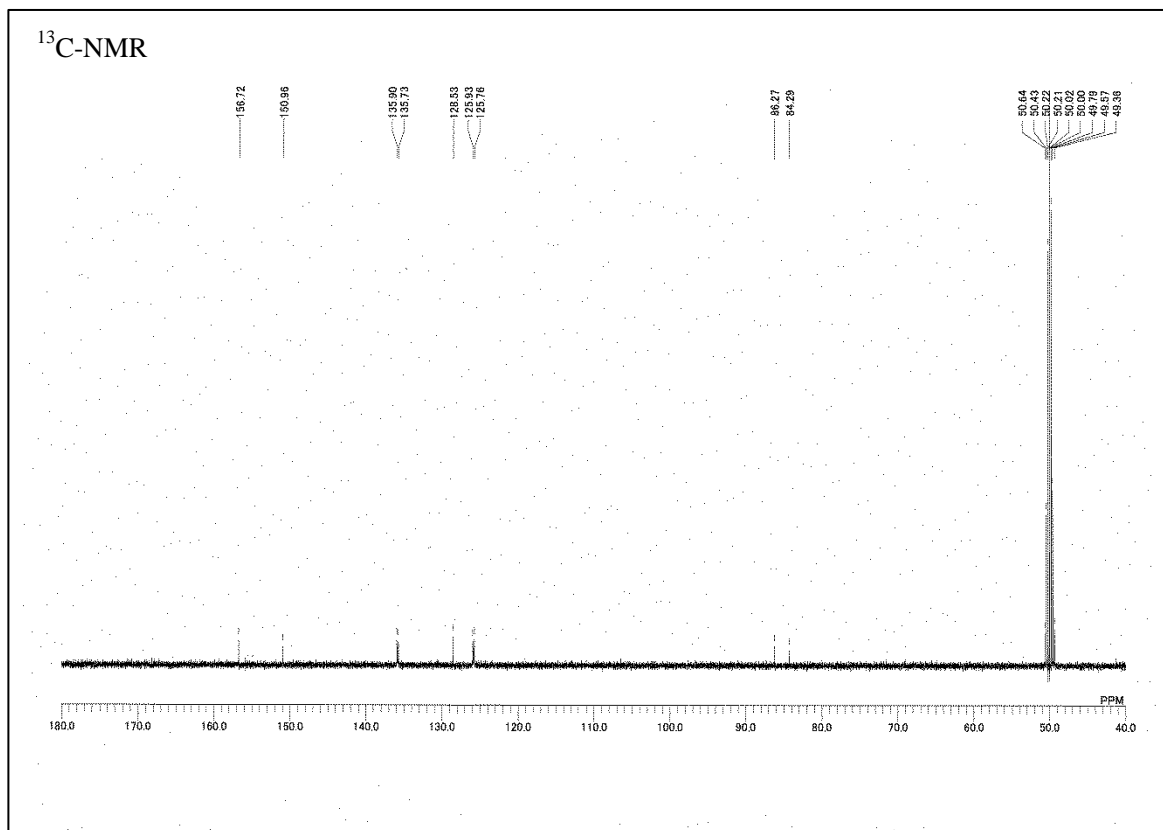

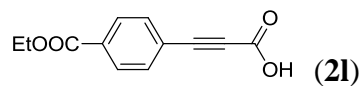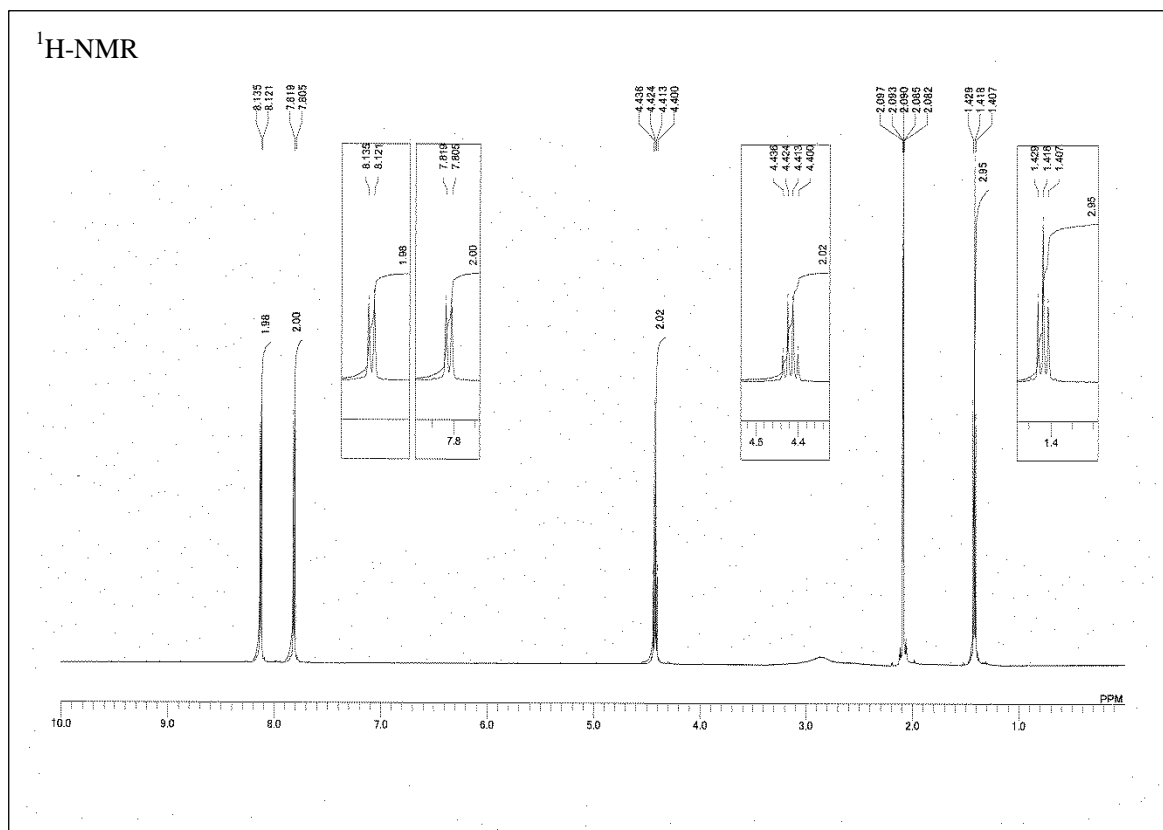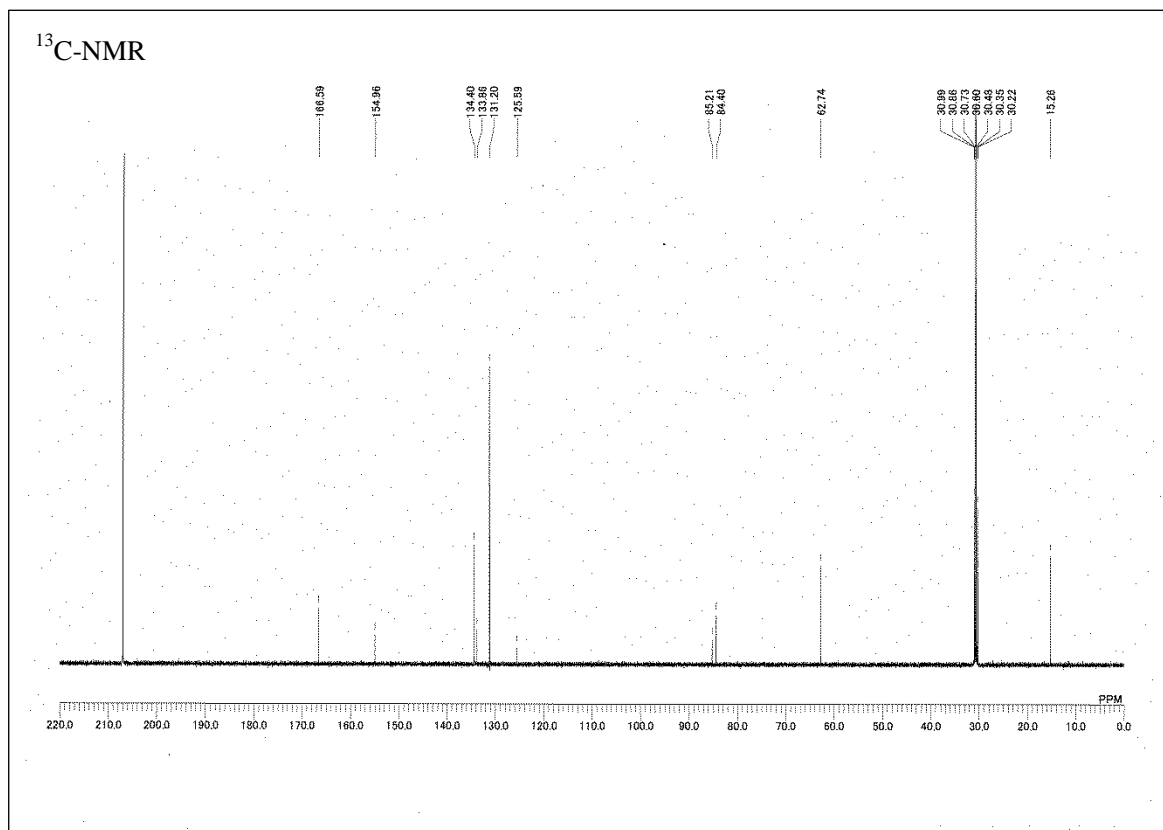

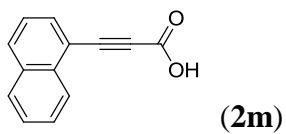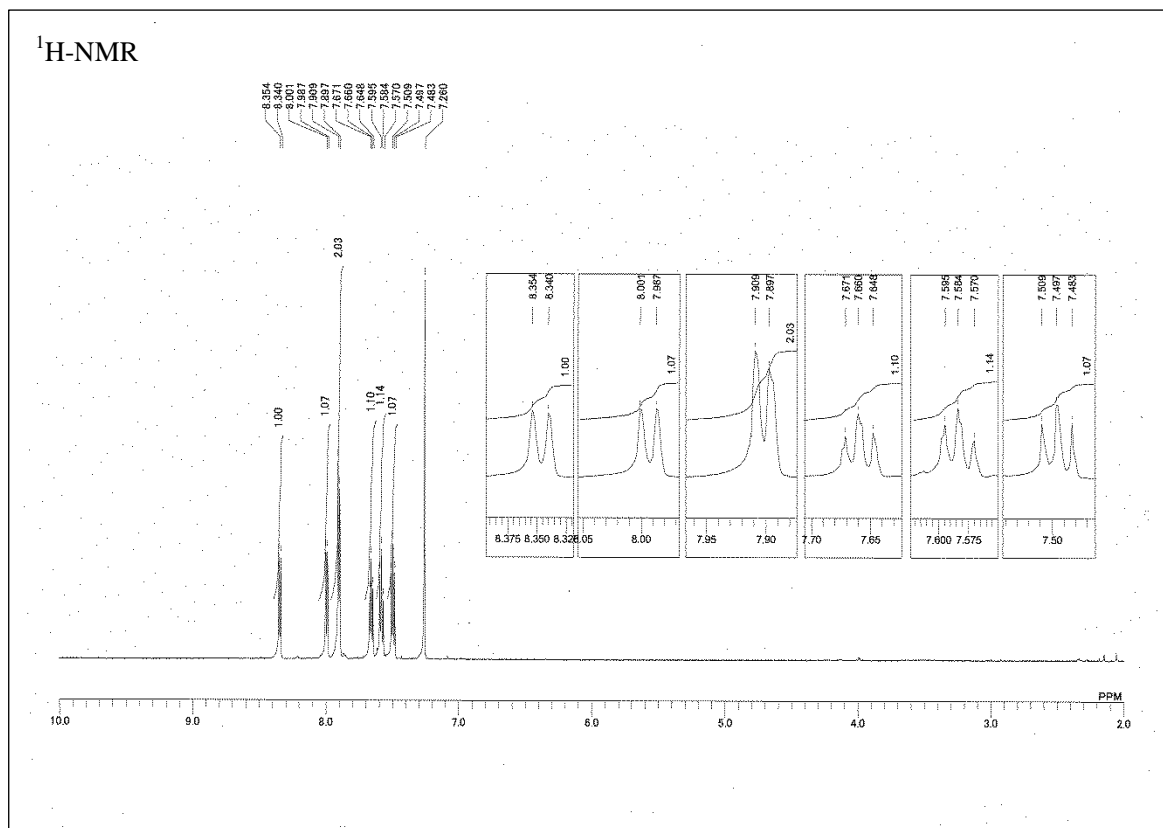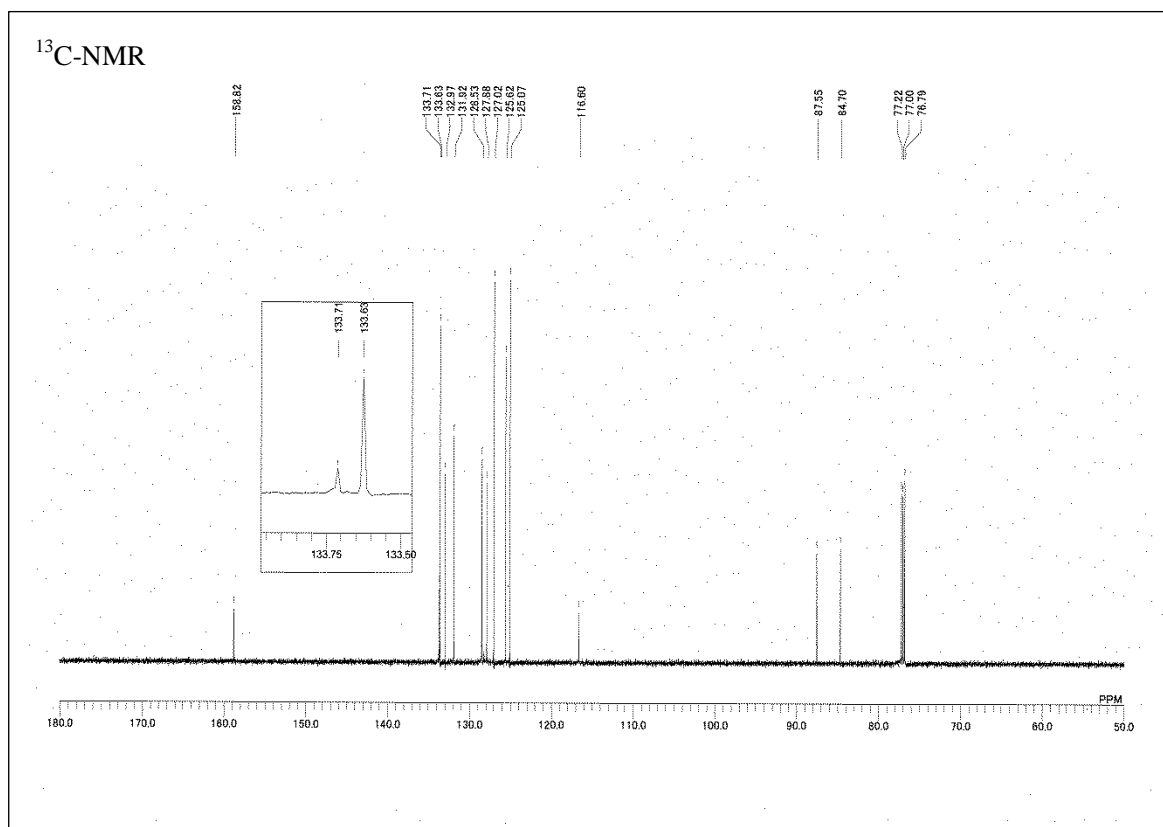

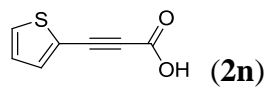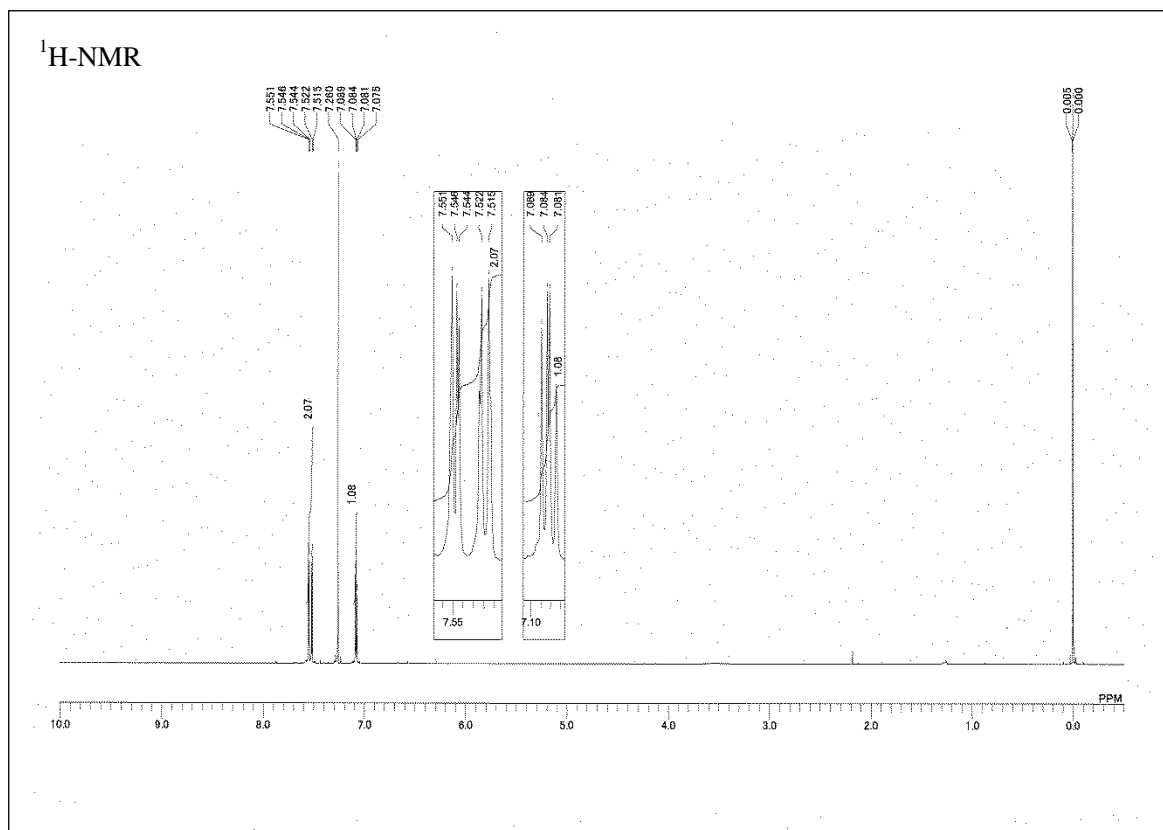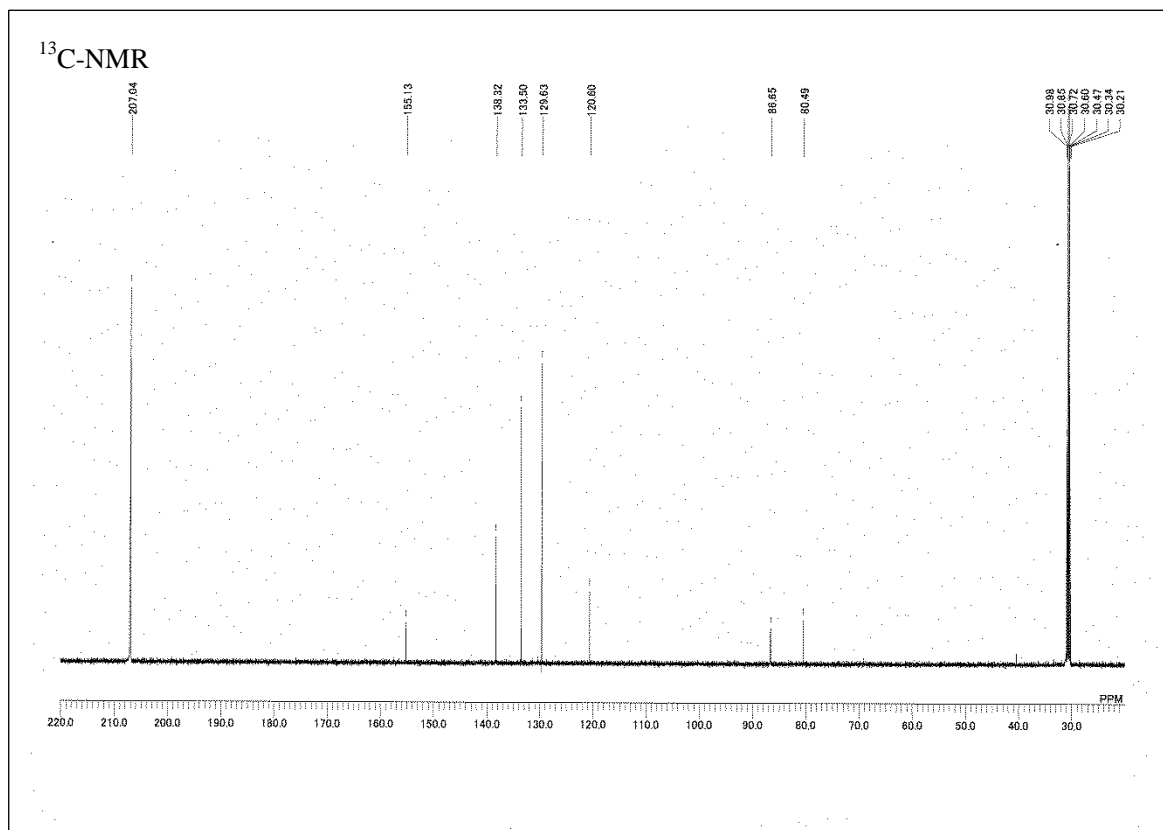

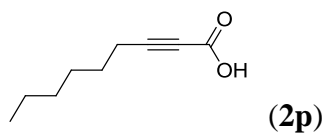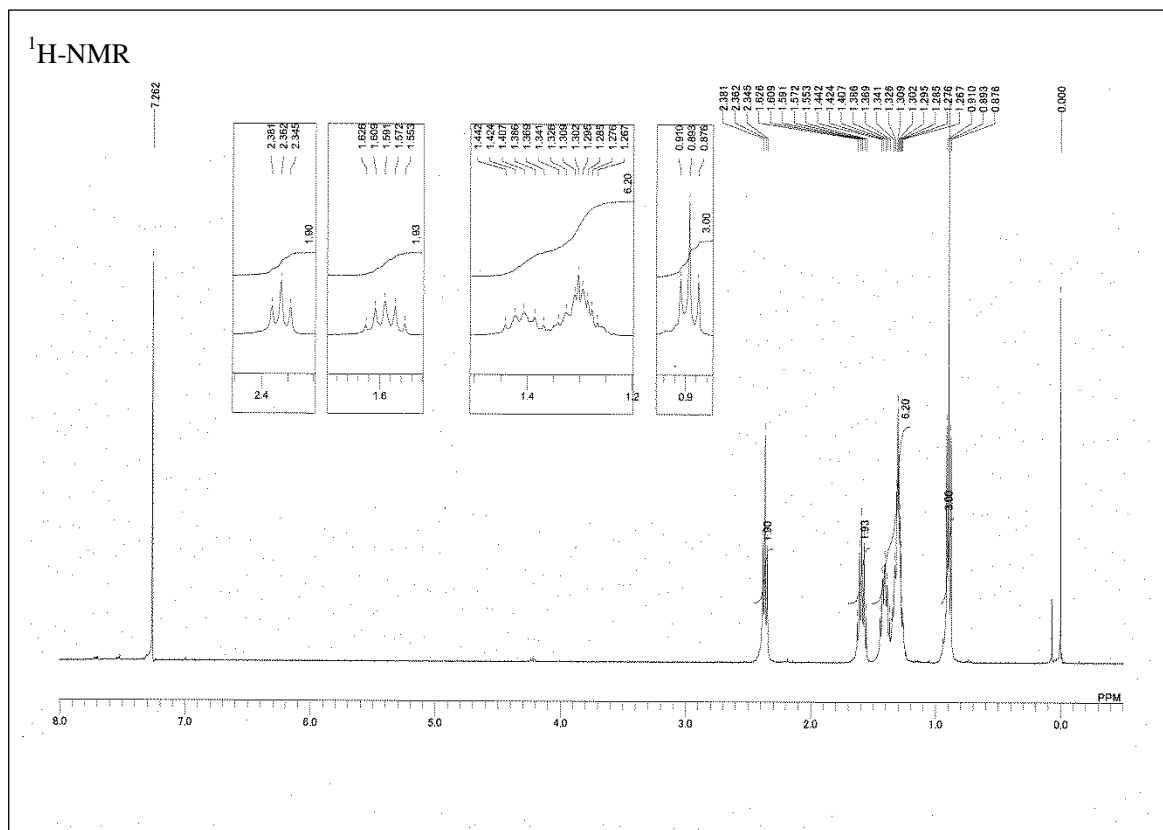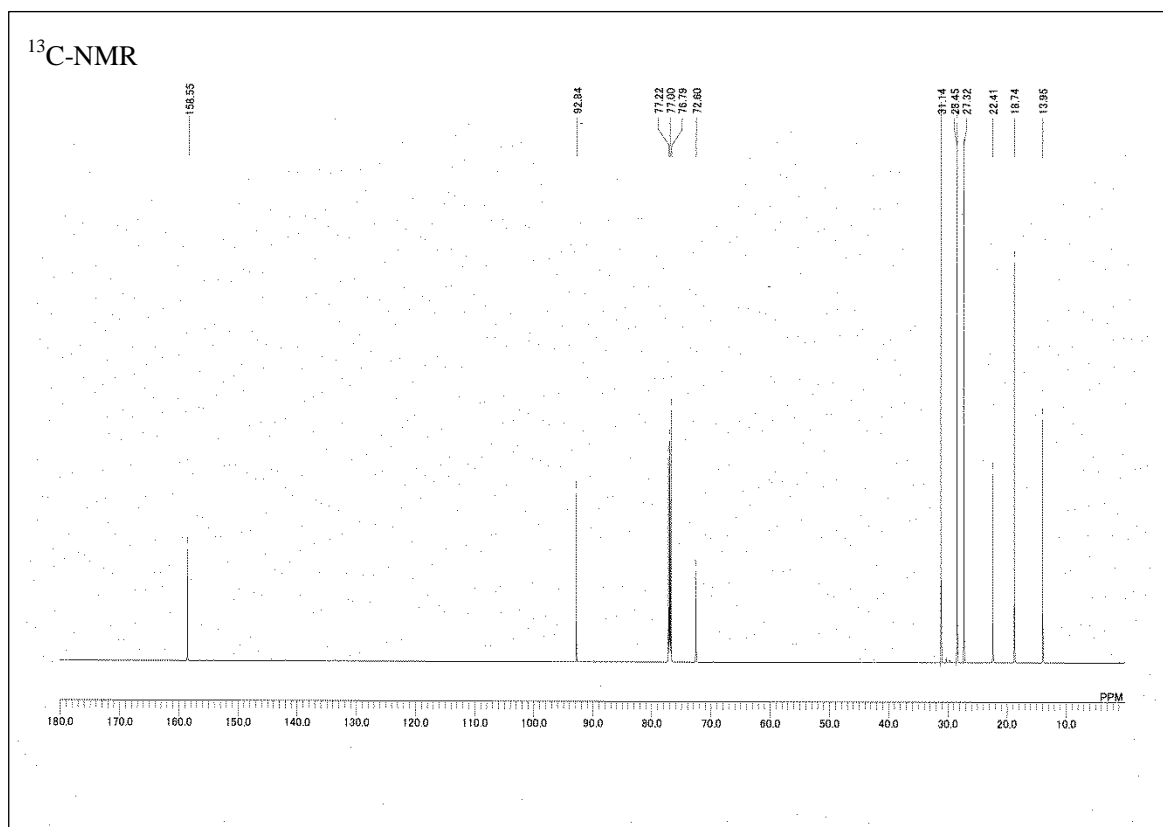



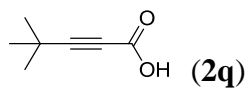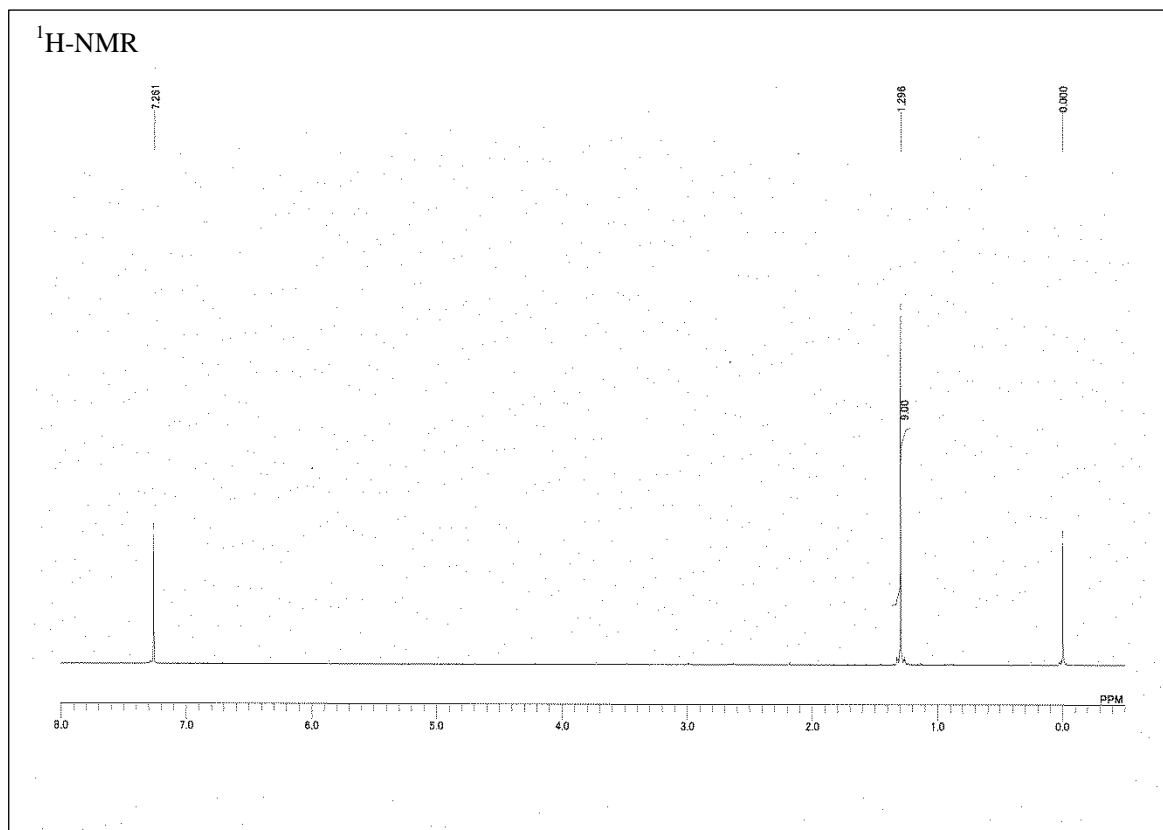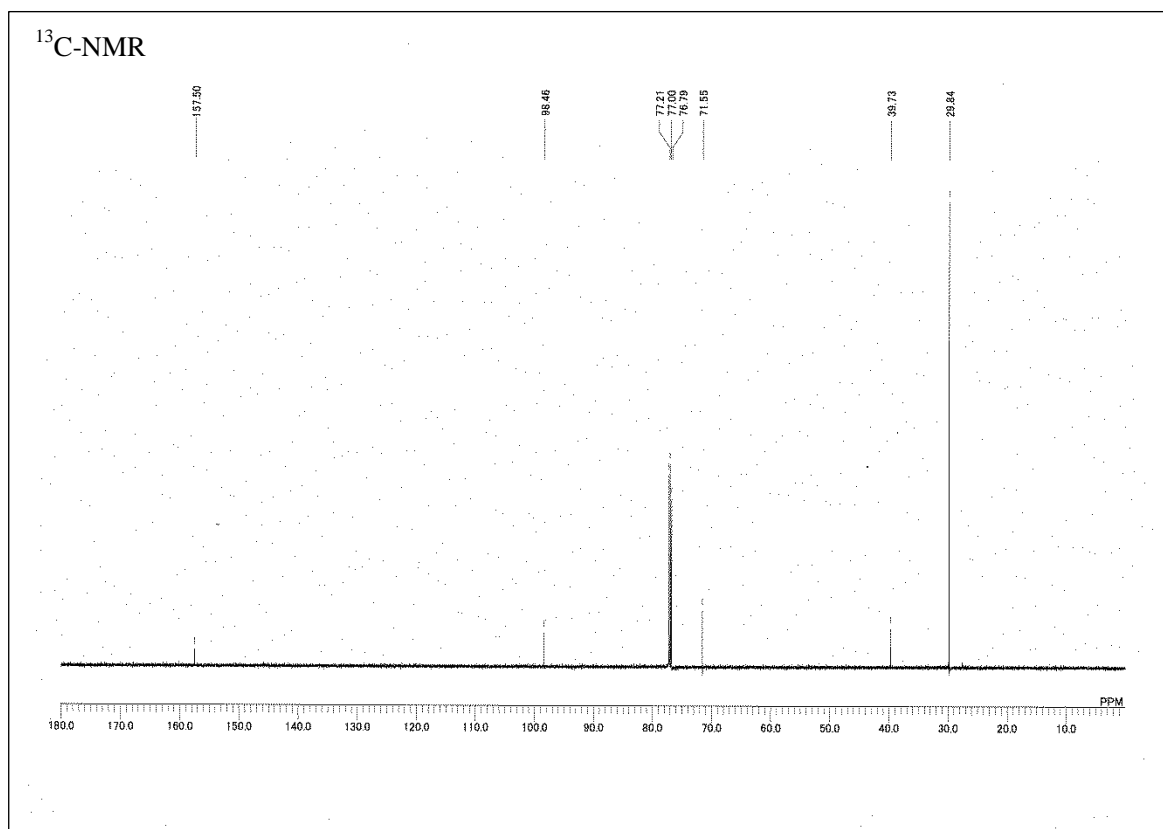

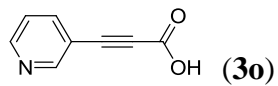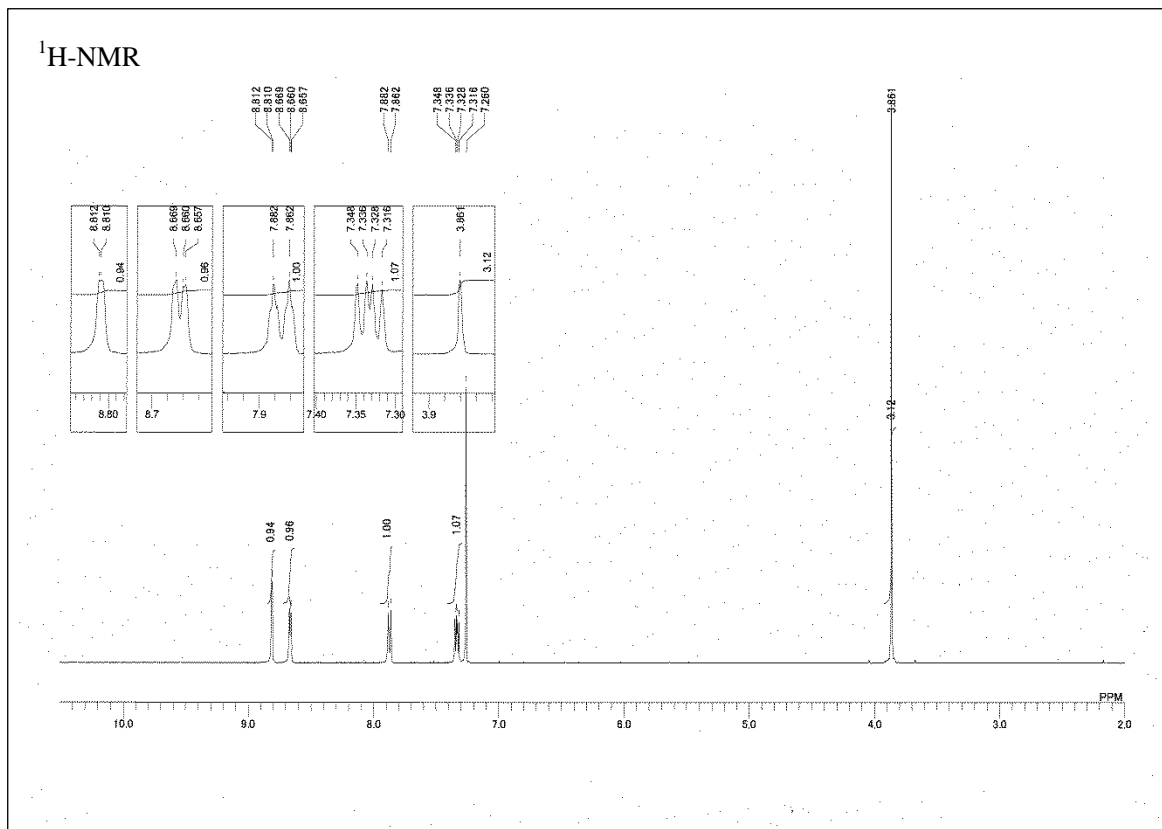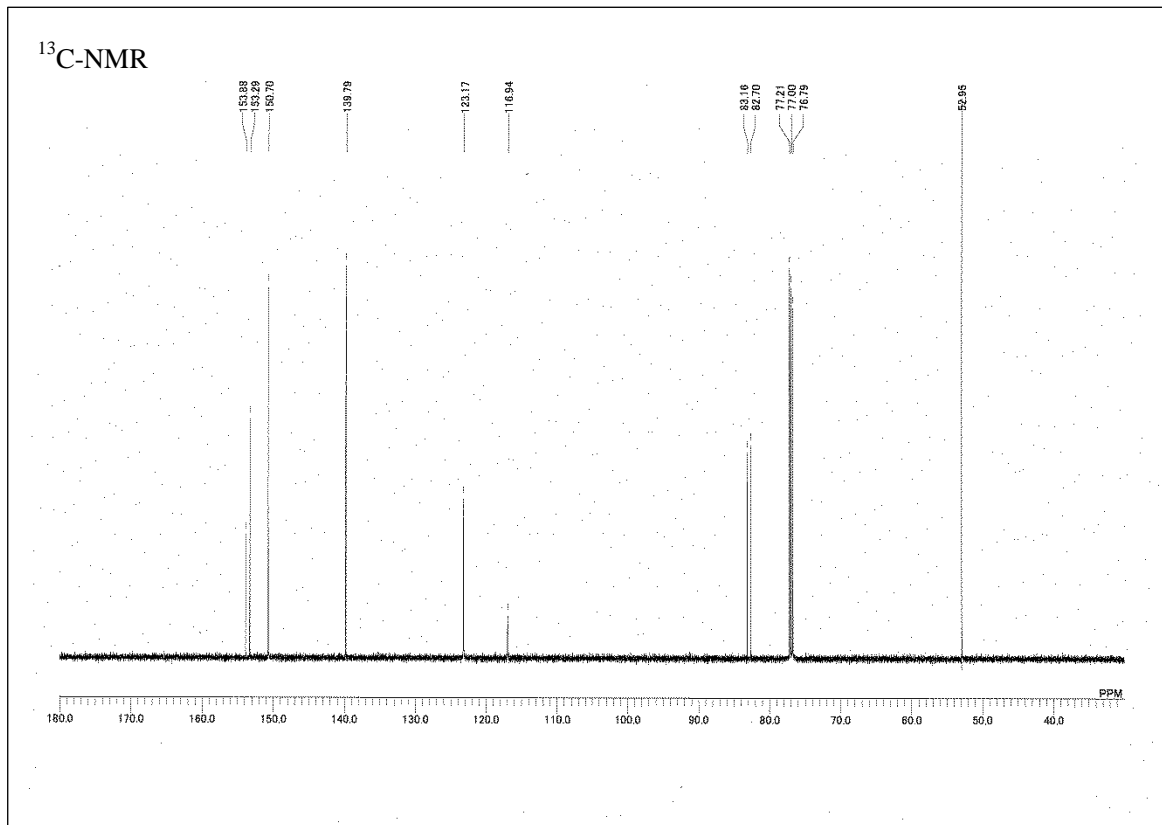

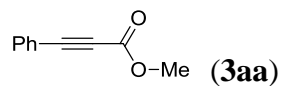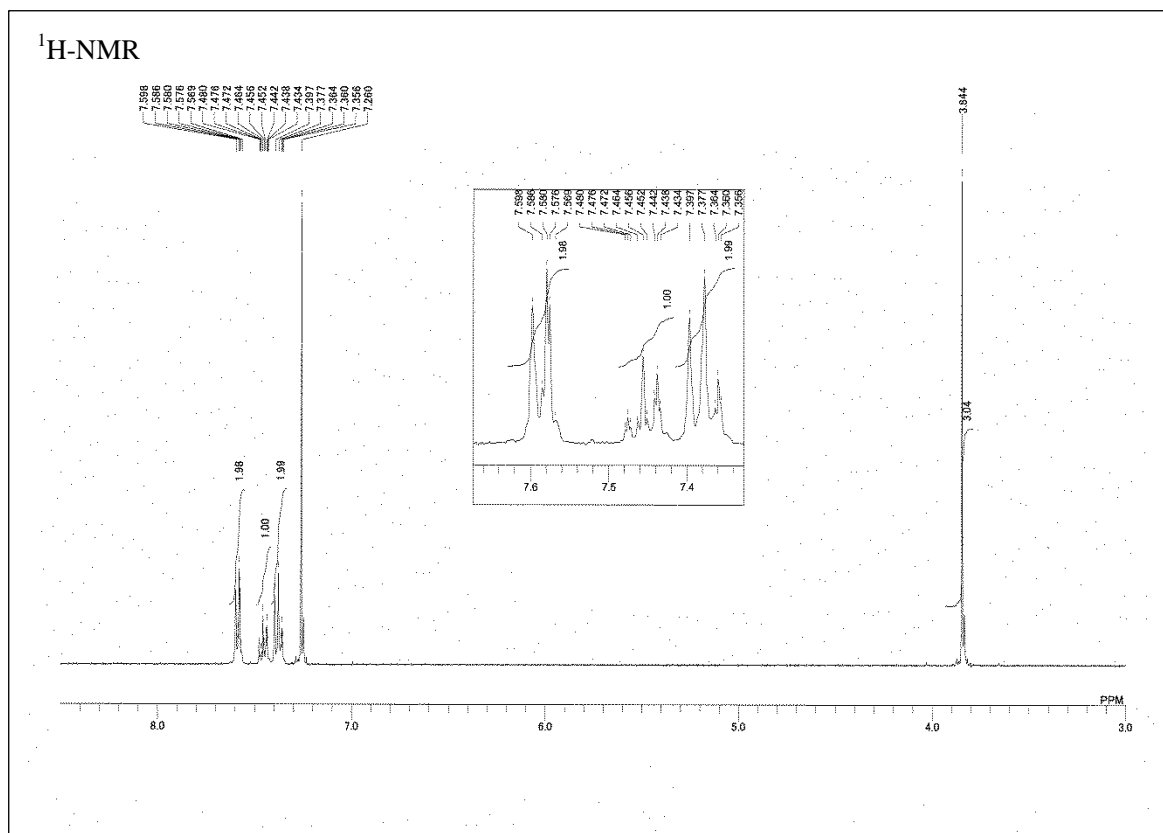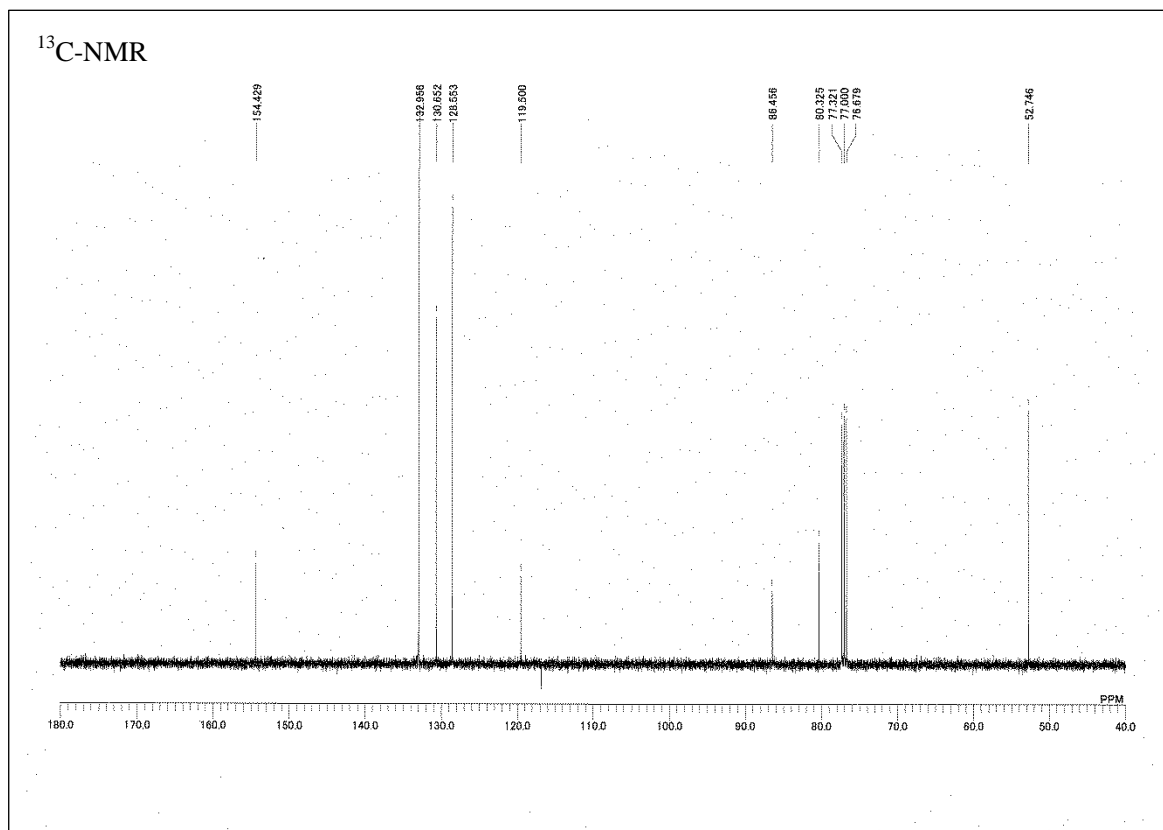

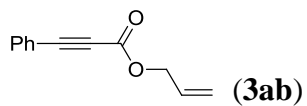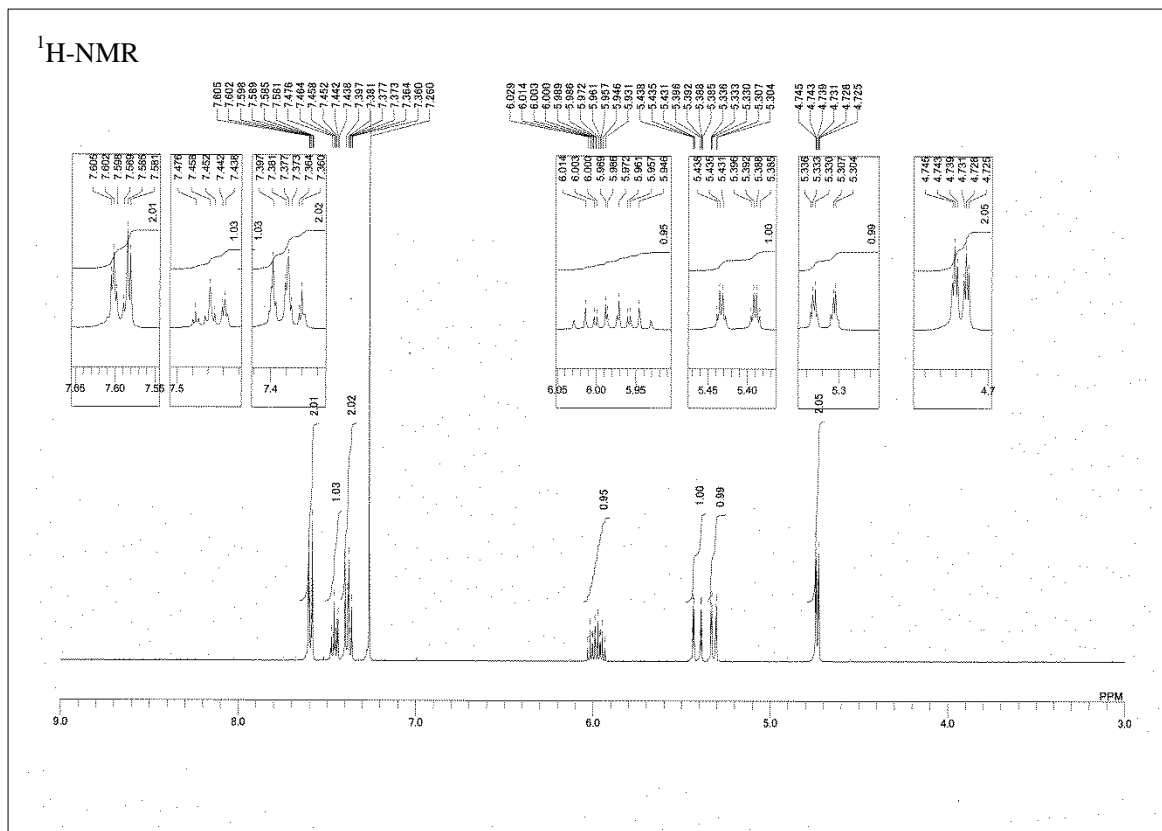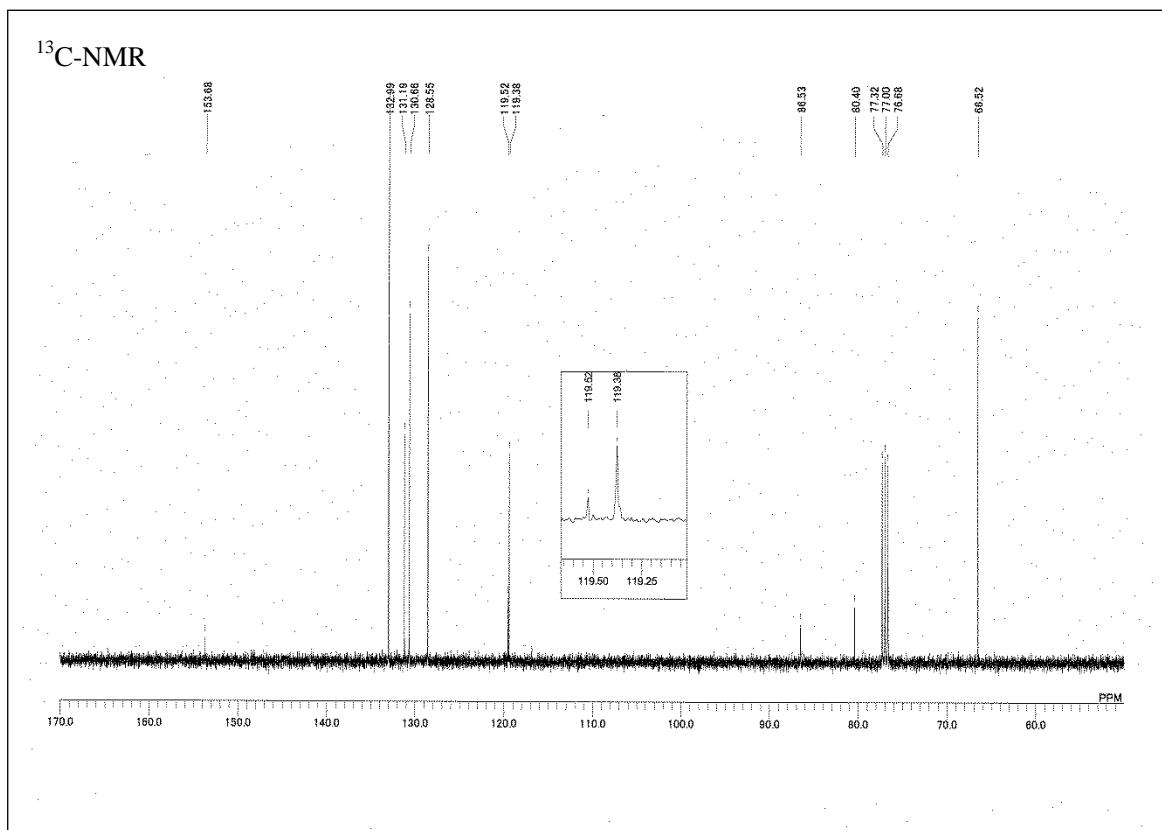

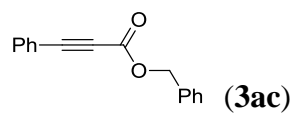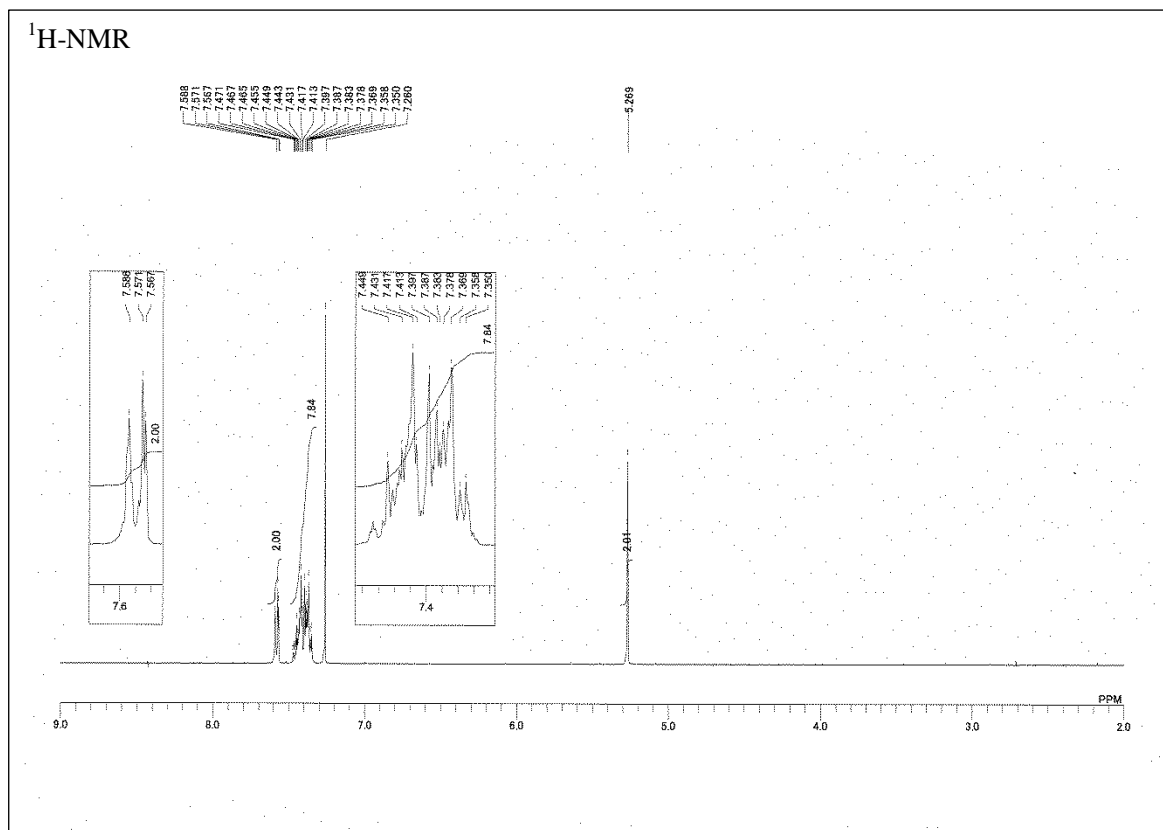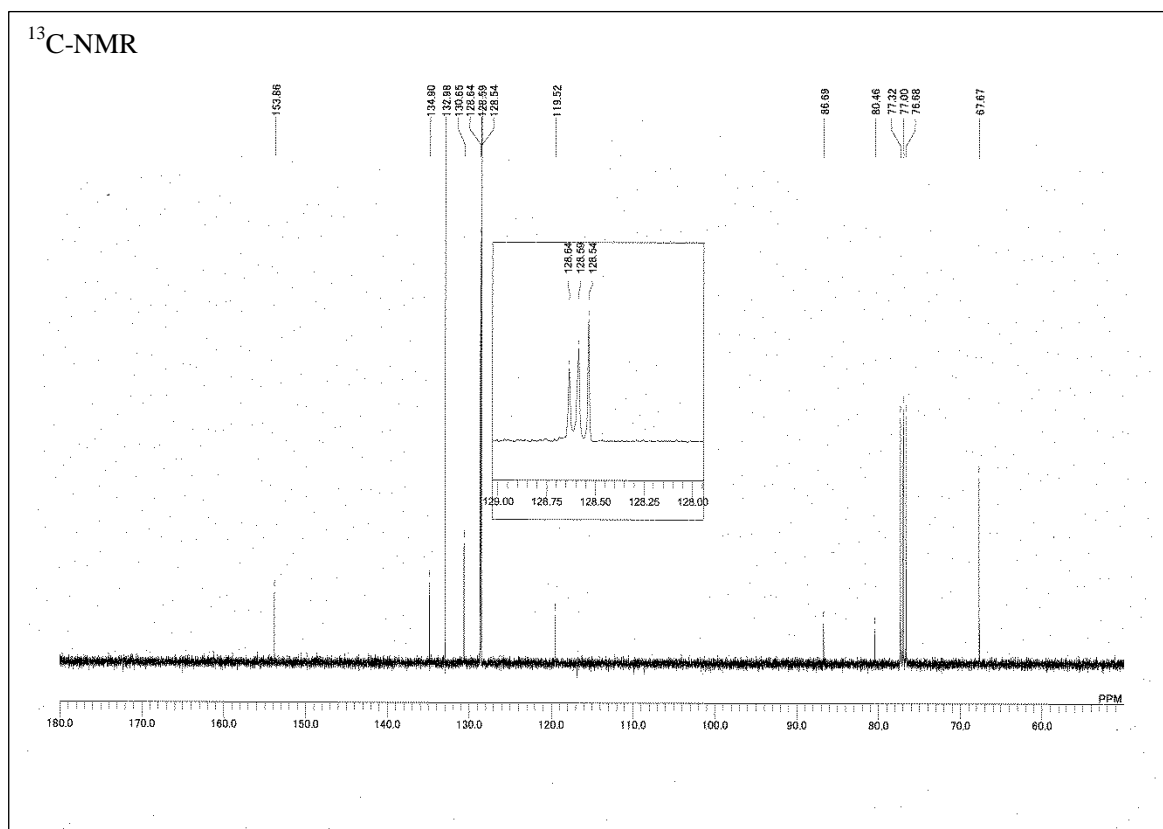

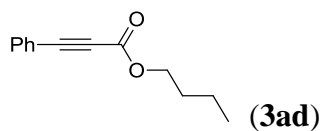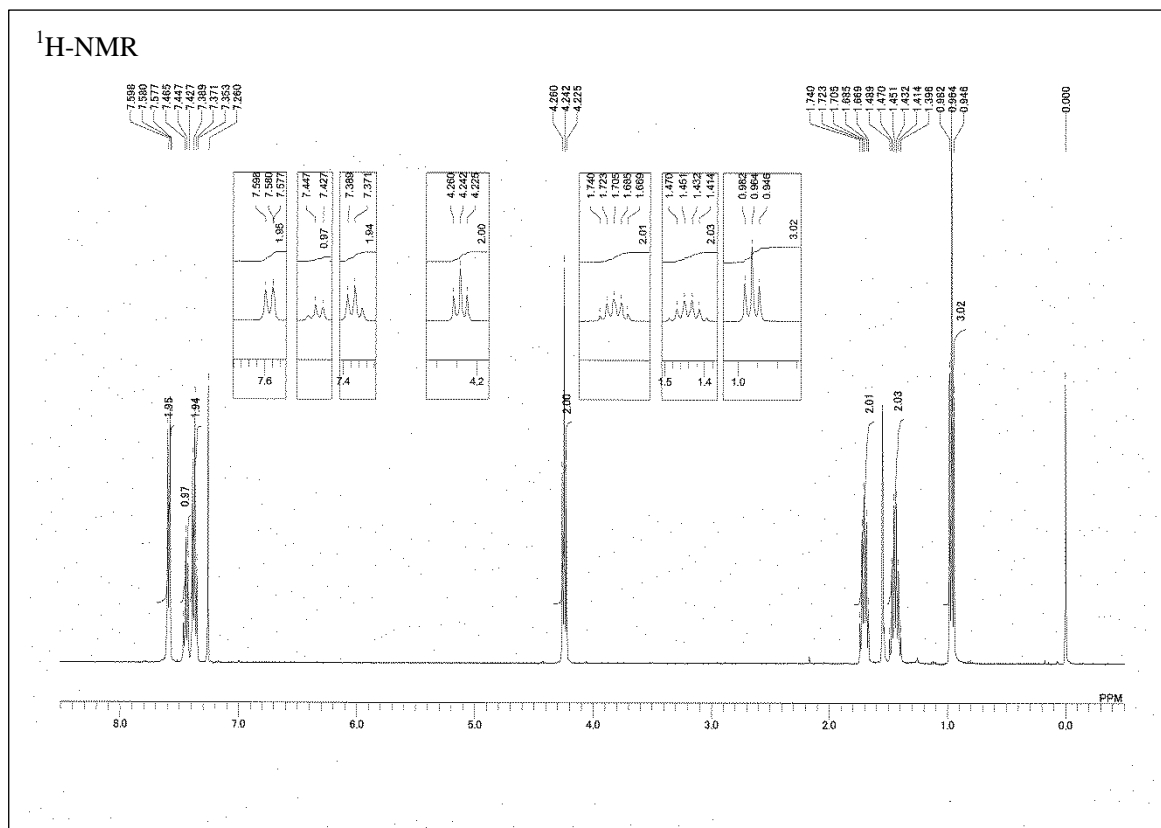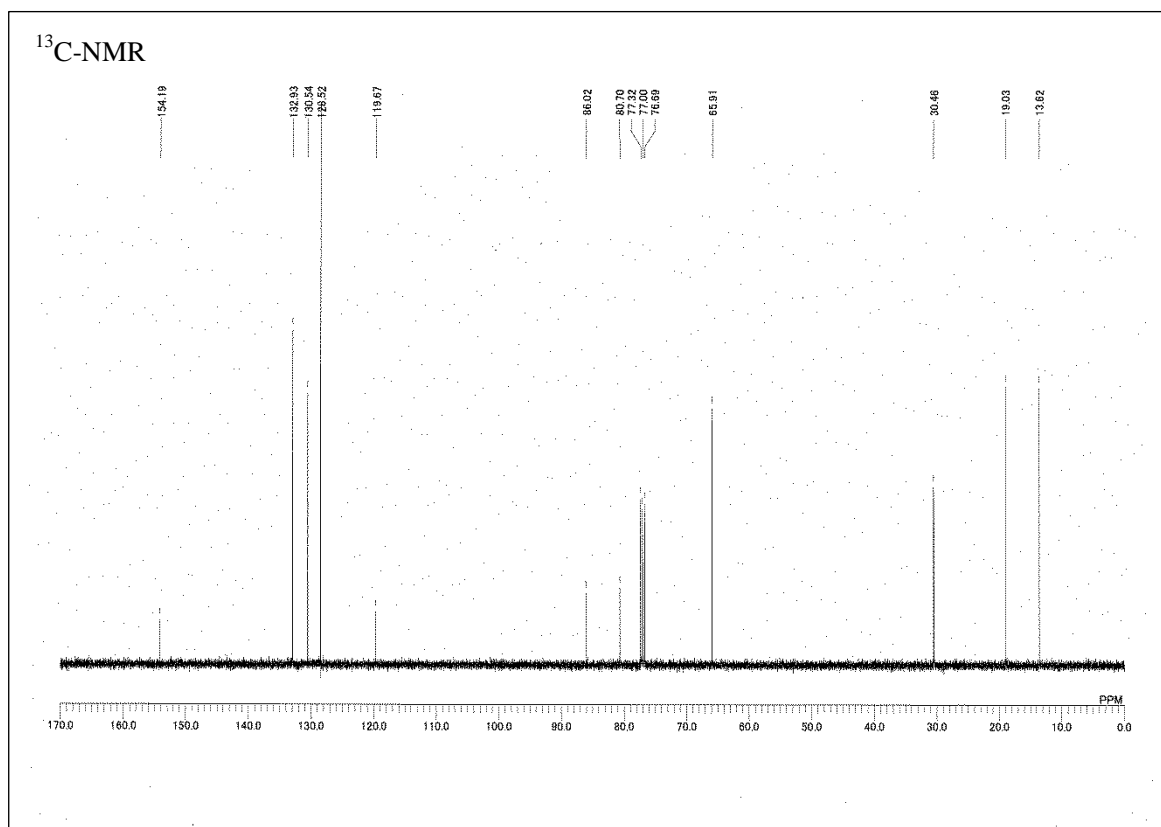

Supplement: c3ob40760h.pdf [file c3ob40760h.pdf]
